# Supplementary material for: Novel long non-coding RNAs are specific diagnostic and prognostic markers for prostate cancer
Source: PubMed Central journal article supplement (PMC4414171; doi:10.18632/oncotarget.2879), 2015-02-17
Supplement: oncotarget-06-4036-s001.pdf [file oncotarget-06-4036-s001.pdf]

SUPPLEMENTARY FIGURES AND TABLES

EPCAT expression in Taylor

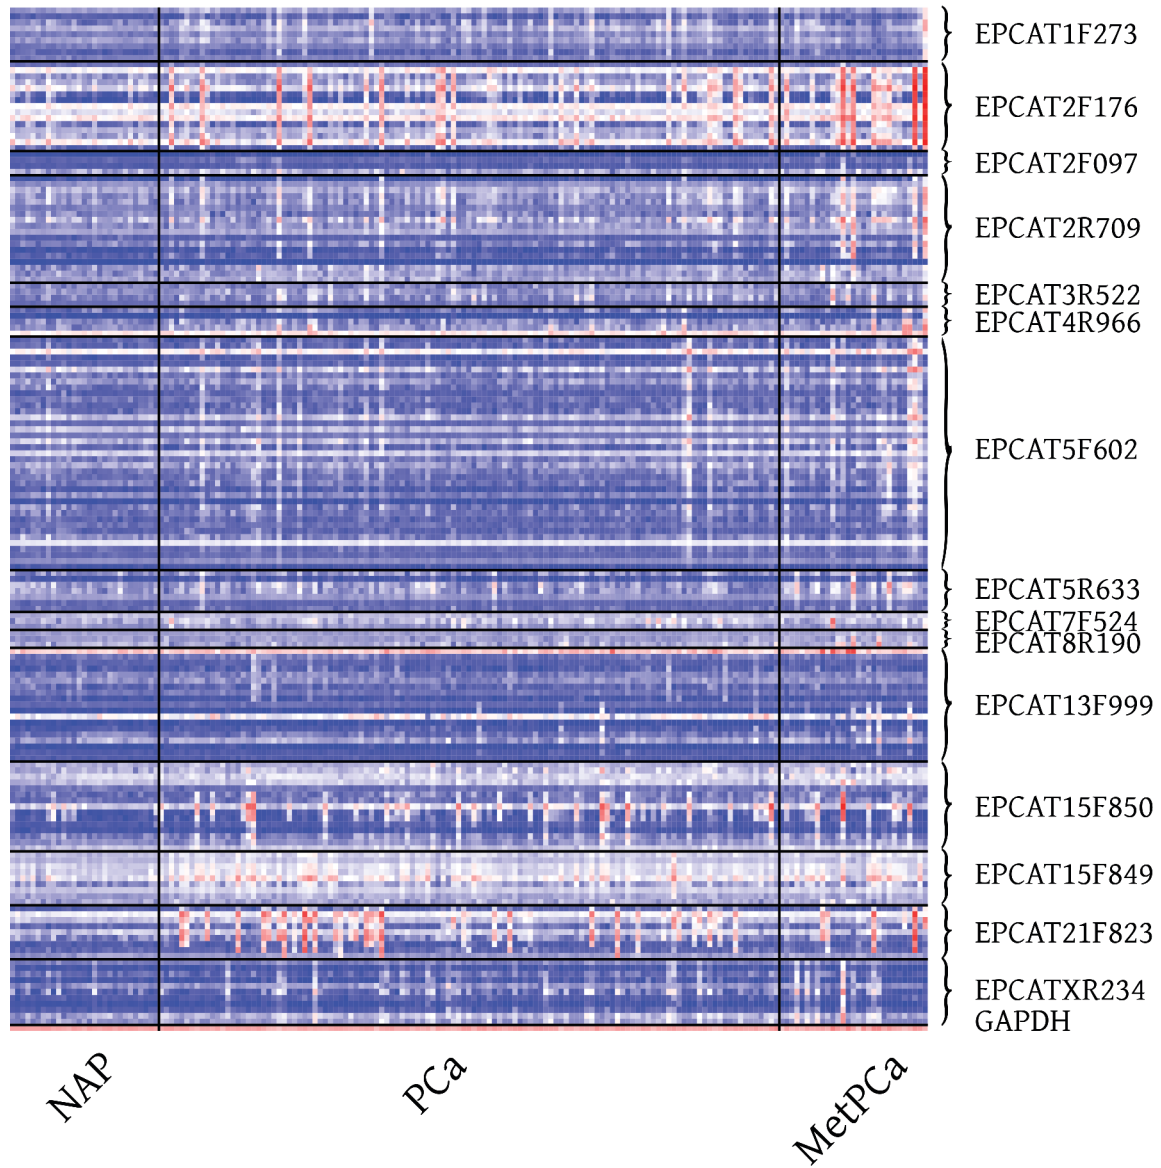

Supplementary Figure 1: Expression of RT-PCR validated EPCATs in samples of ‘Taylor’ (GSE21034), comprising localized prostate cancer (PCa), metastasis (MetPCa) and normal adjacent prostate (NAP) tissue.

## EPCAT expression in Brase

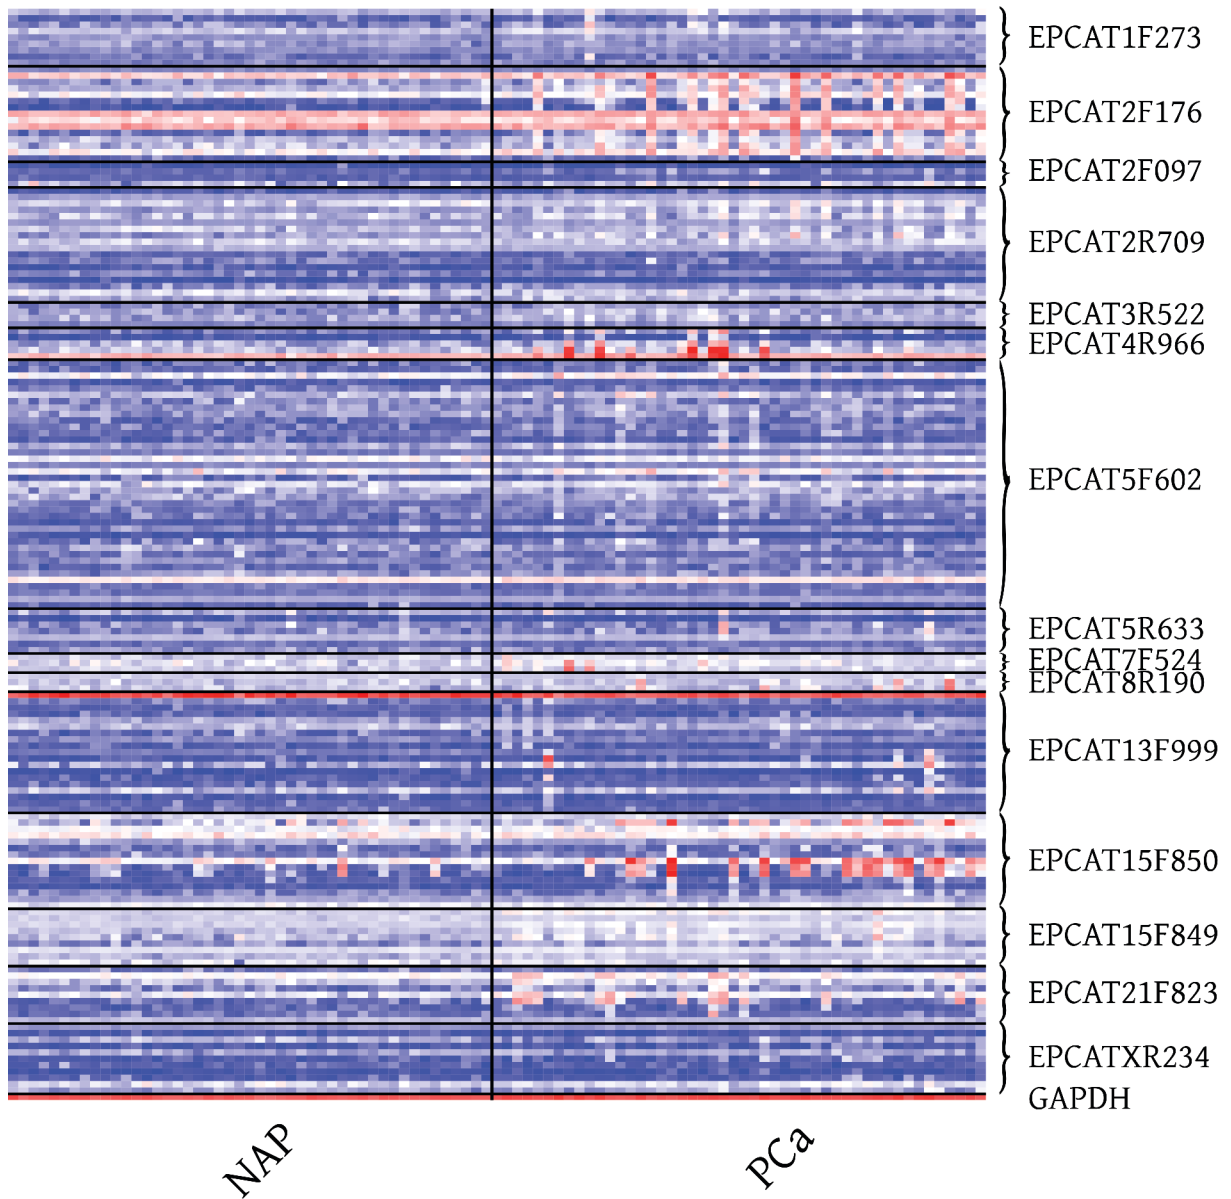

**Supplementary Figure 2:** Expression of RT-PCR validated EPCATs in ‘Brase’ (GSE29079), comprising localized prostate cancer (PCa) and normal adjacent prostate (NAP) tissue.

## EPCAT expression in various cancers

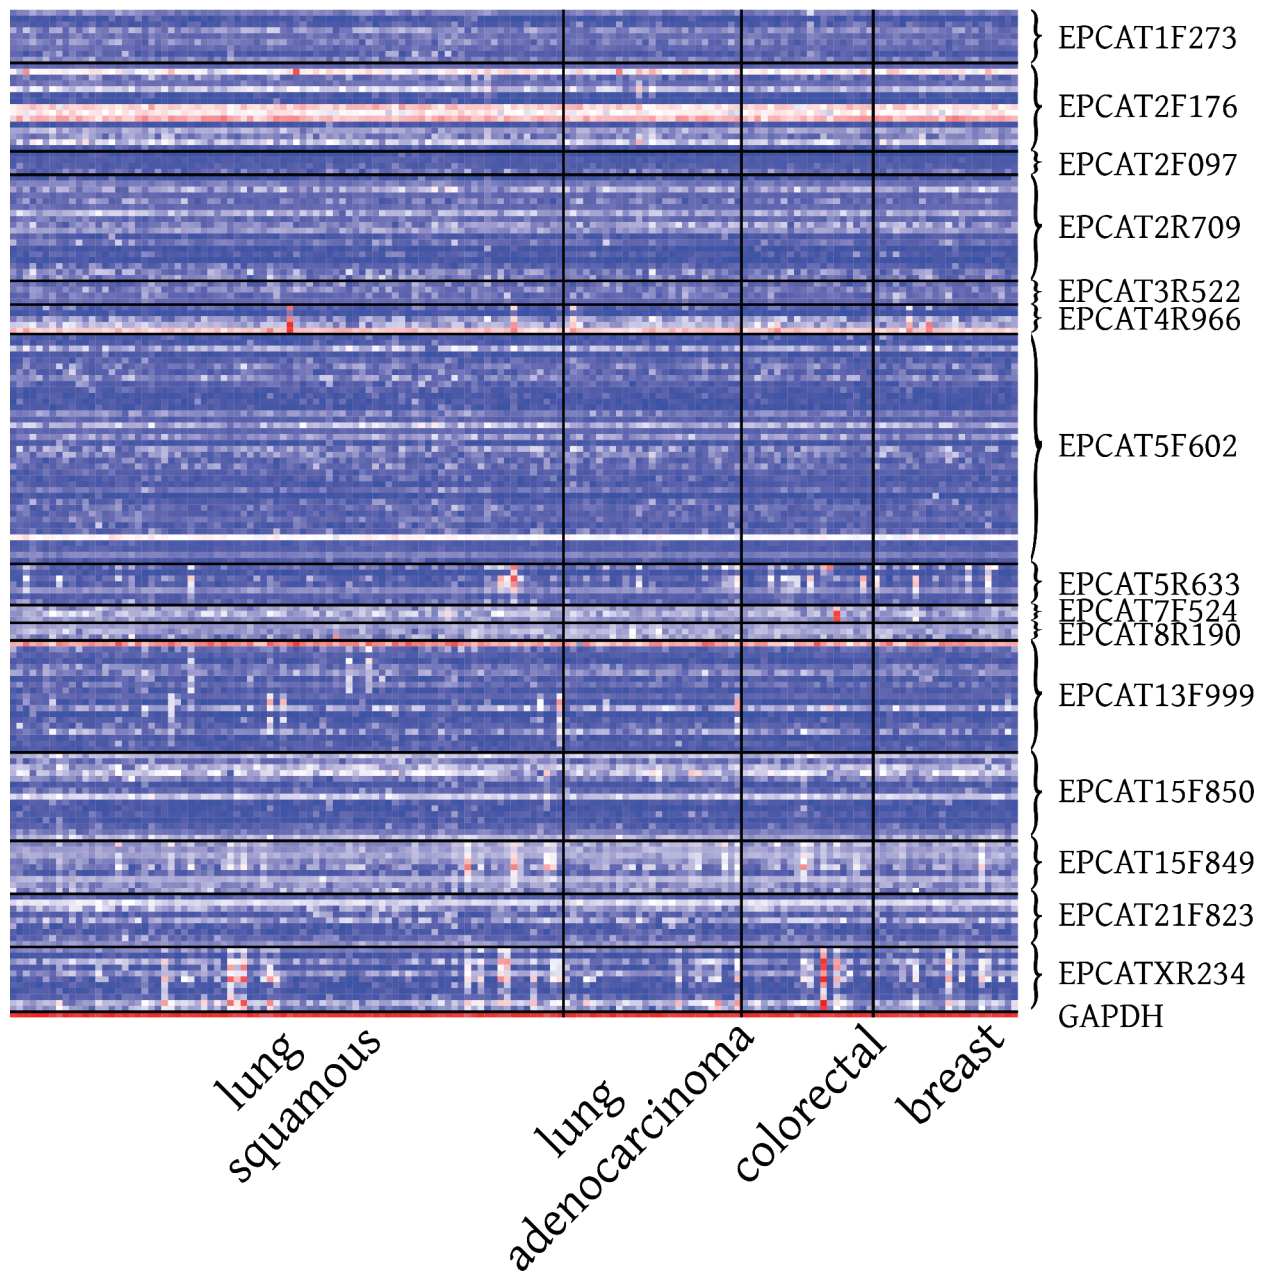

Supplementary Figure 3: Expression of RT-PCR validated EPCATs in breast, colorectal and lung cancer tissue tissue (GSE21034).

# EPCAT expression in lung tissue

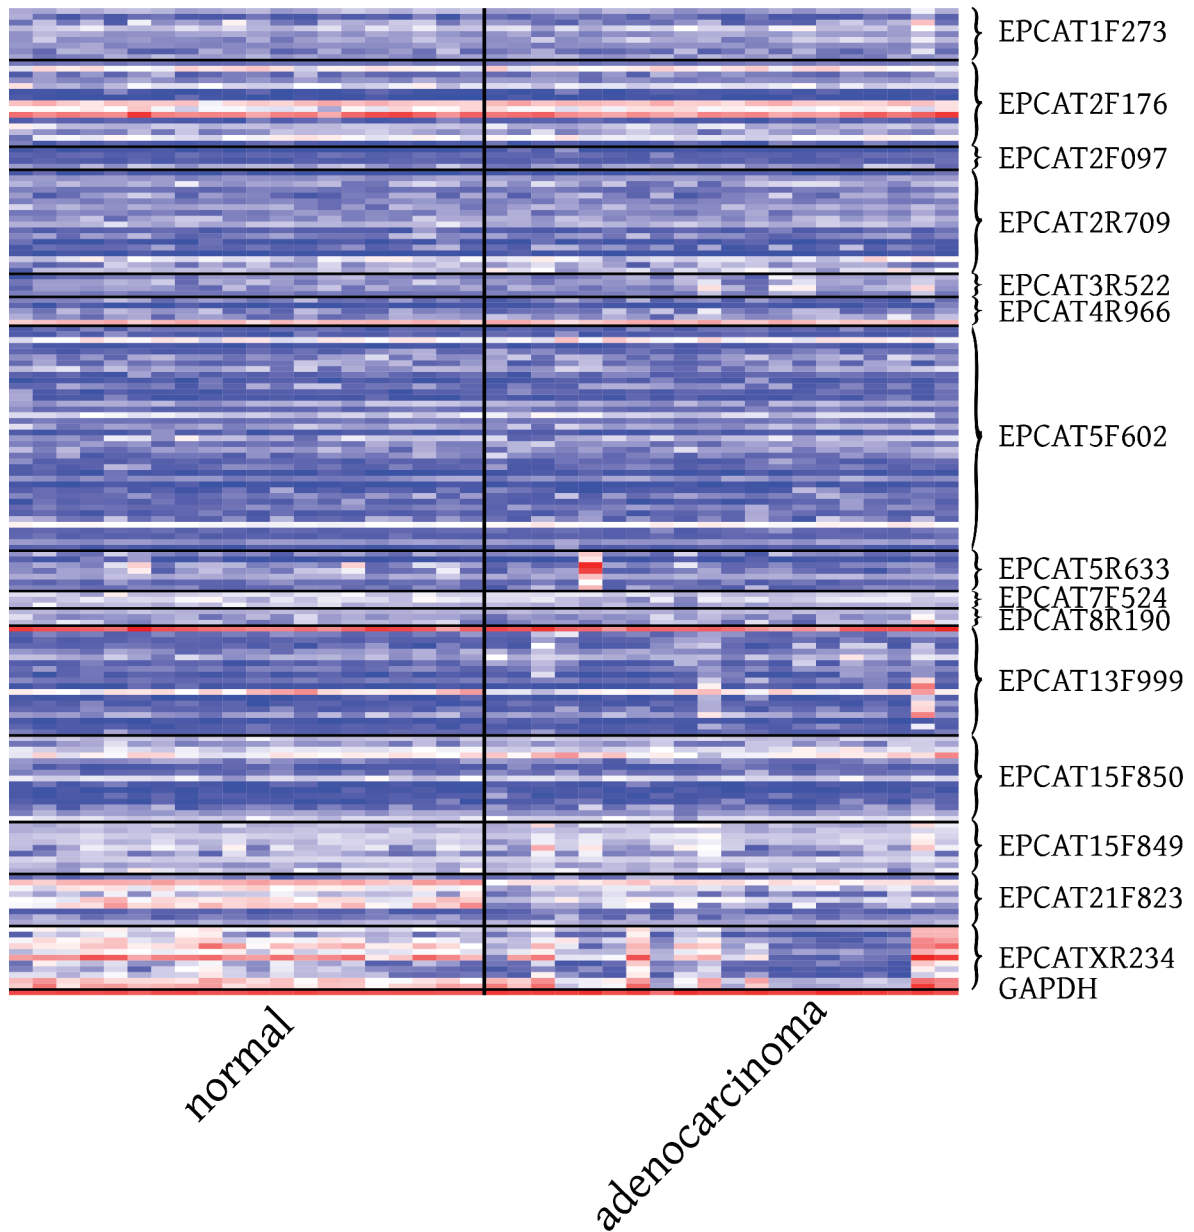

Supplementary Figure 4: Expression of RT-PCR validated EPCATs in lung cancer (GSE12236).



## EPCAT expression in gastric tissue

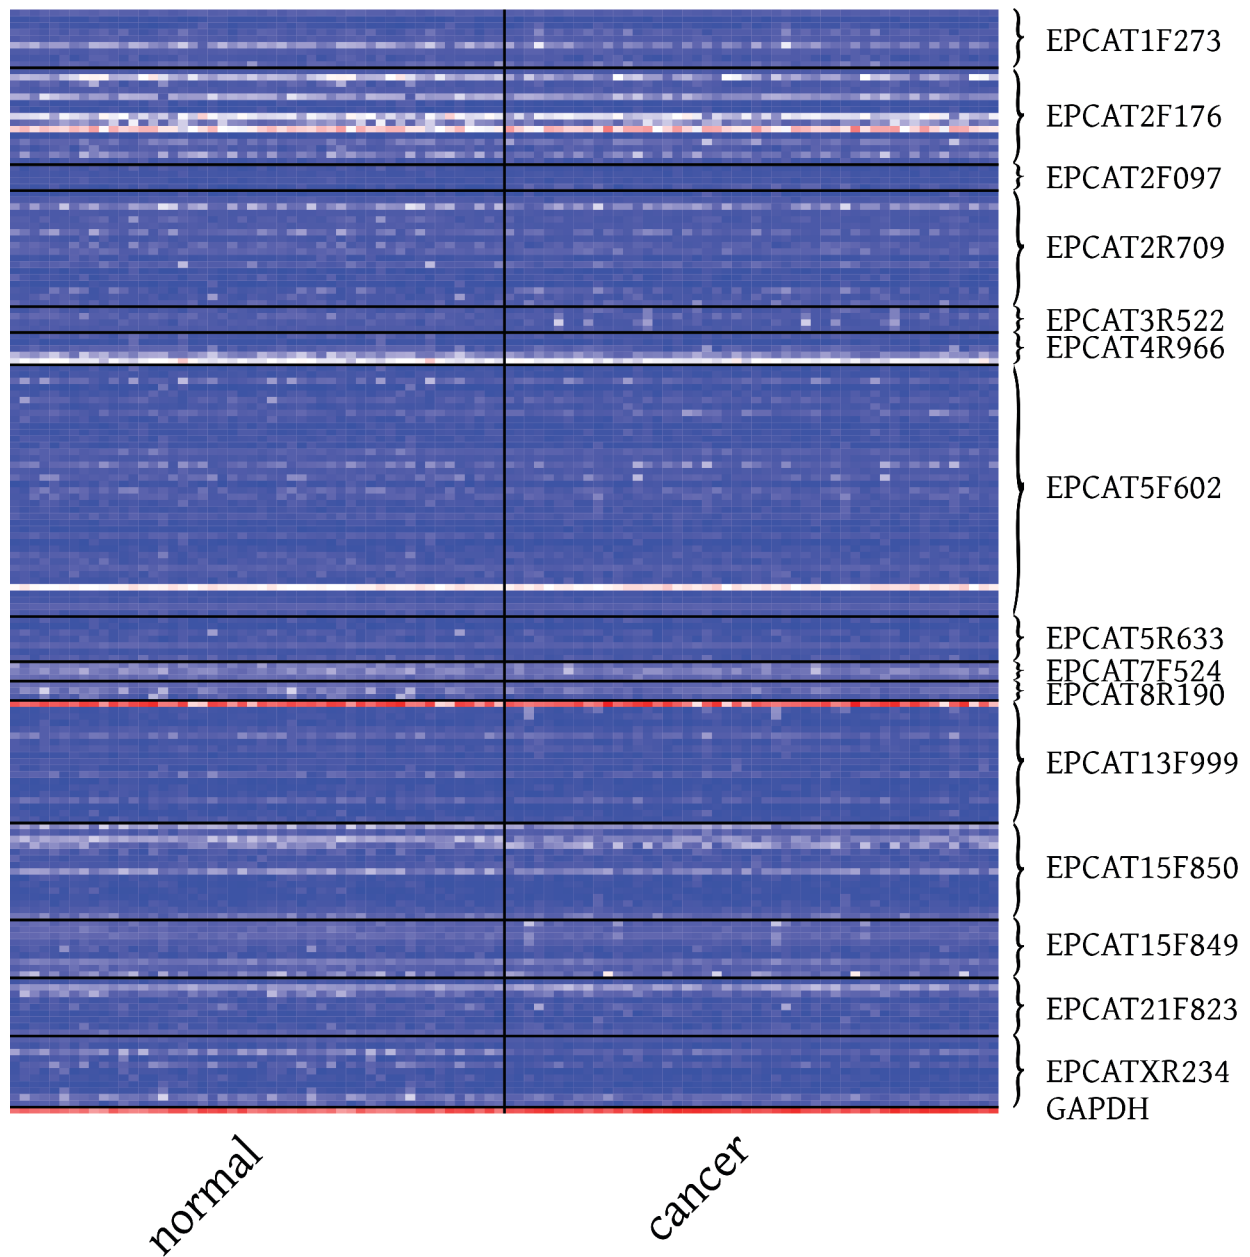

Supplementary Figure 5: Expression of RT-PCR validated EPCATs in gastric cancer (GSE13195).

## EPCAT expression in brain tissue

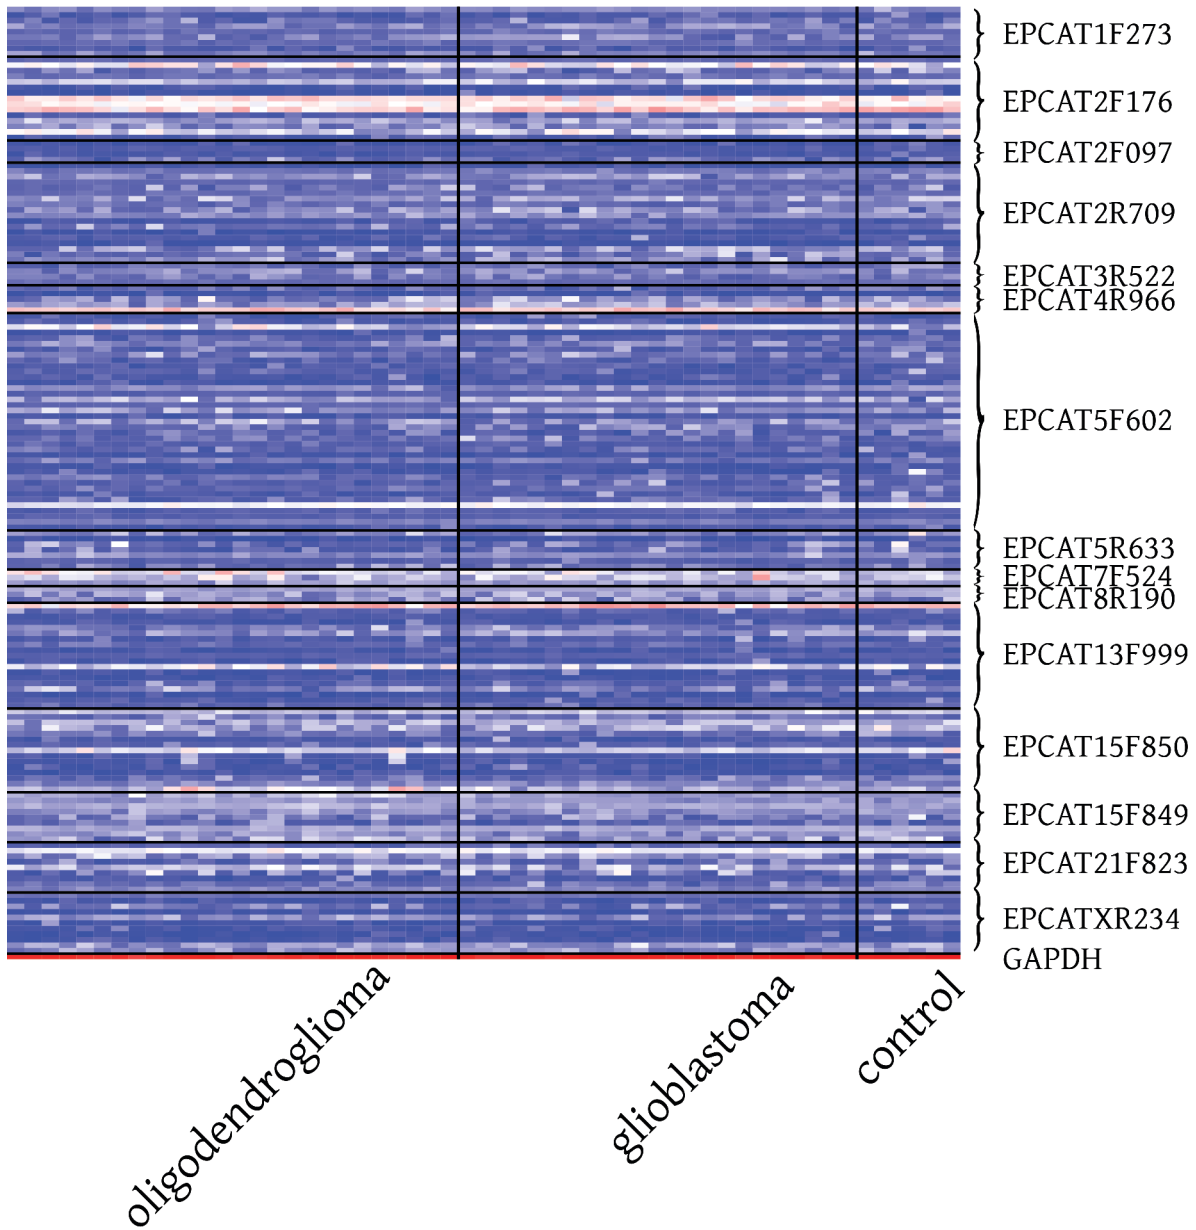

Supplementary Figure 6: Expression of RT-PCR validated EPCATs in brain cancer (GSE9385).

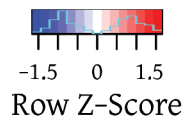

### Androgen regulated EPCATs in LNCaP

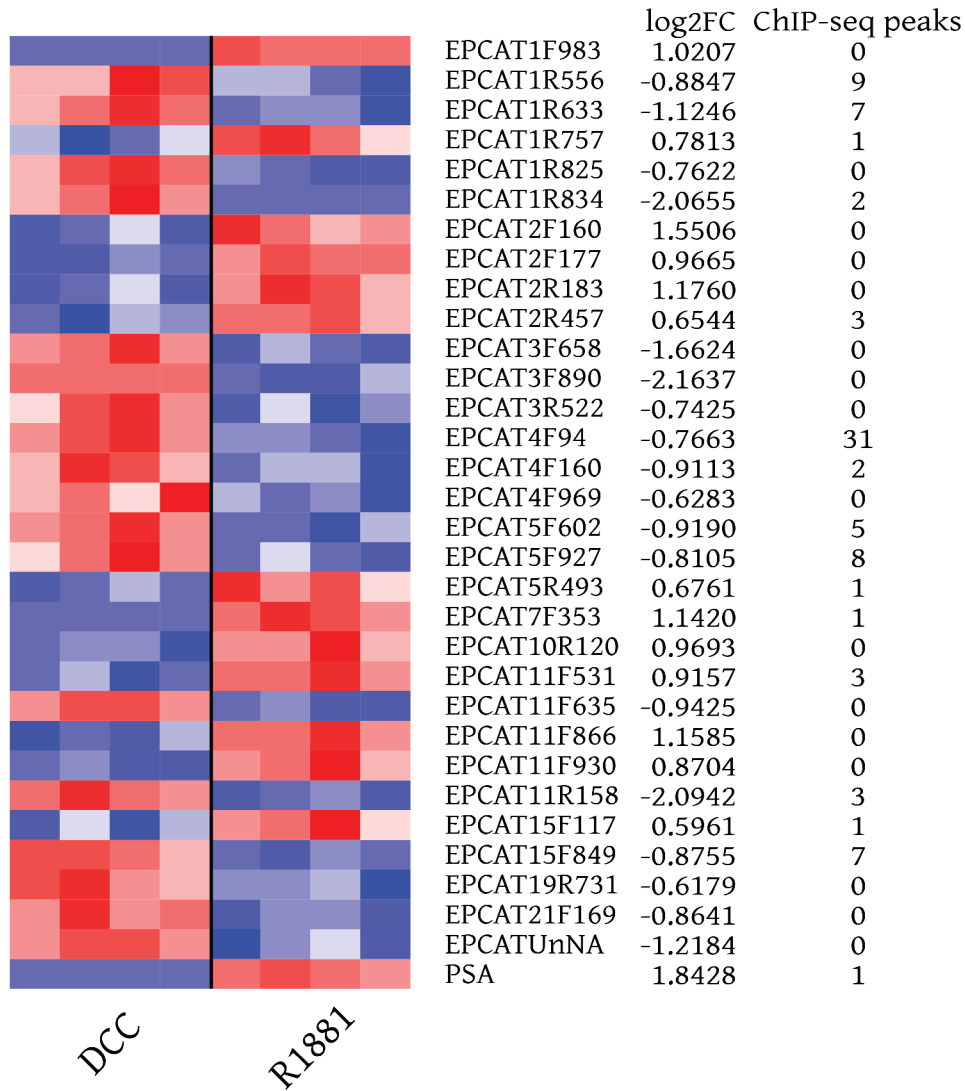

**Supplementary Figure 7: Expression of potentially AR regulated EPCATs in prostate cancer cell line LNCaP, treated with a synthetic androgen (R1881) or grown in androgen free medium (DCC) (GSE32875).** AR association was evaluated using Welch's t-test, only EPCATs showing significant differences ( $p < 0.05$ ) and with an expression in- or decrease of at least 50% were included.

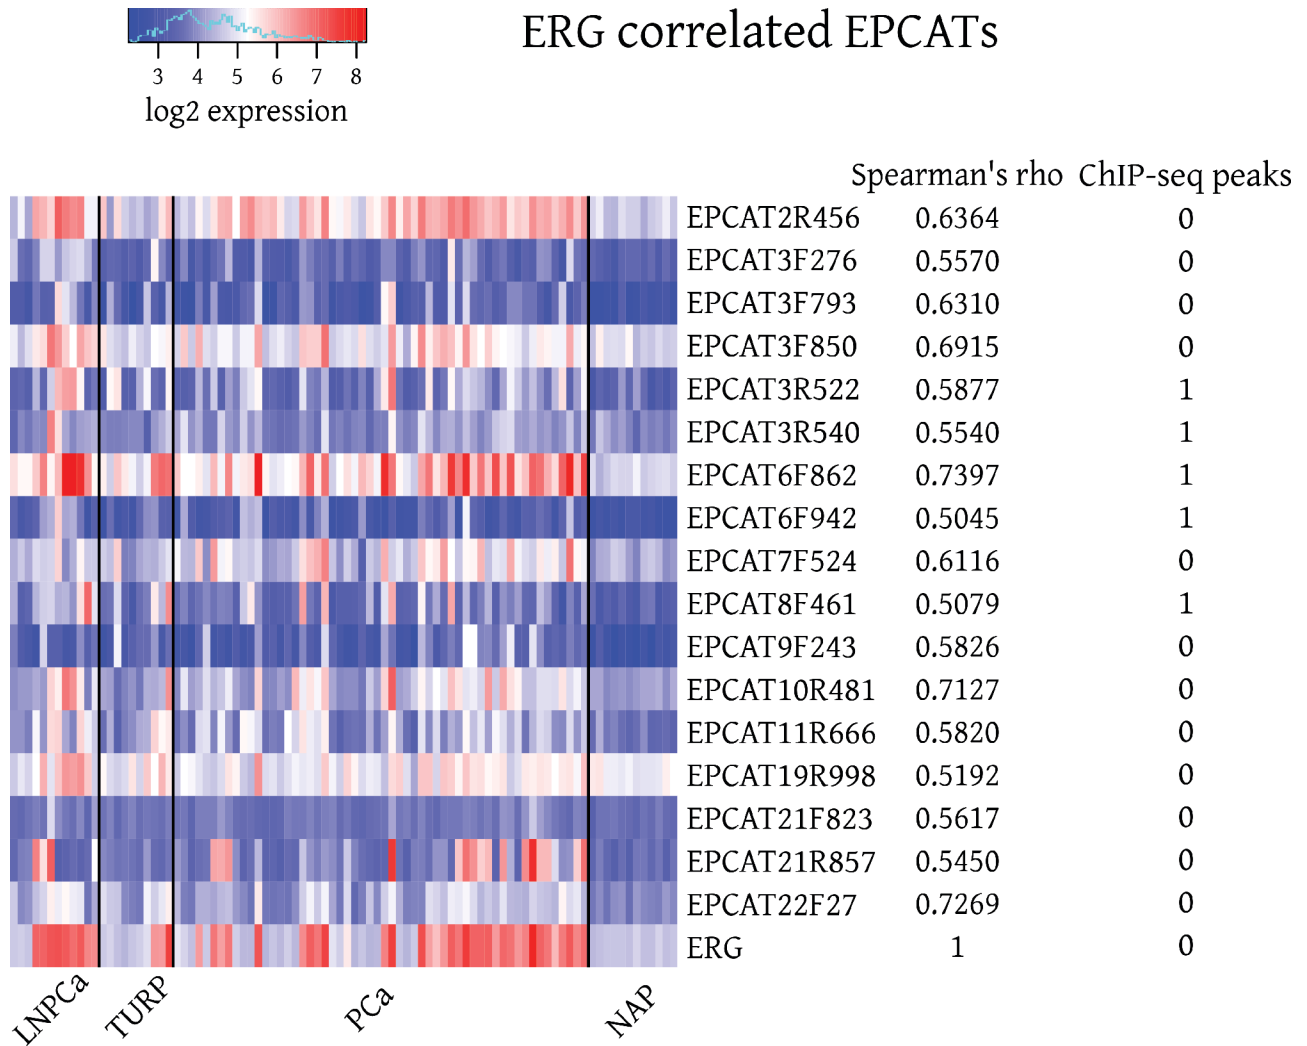

**Supplementary Figure 8: Expression of potentially ERG regulated EPCATs in the EMC dataset.** ERG association was evaluated using Spearman's correlation coefficient, only EPCATs showing significant correlation ( $\rho > 0.5$ ) were included.

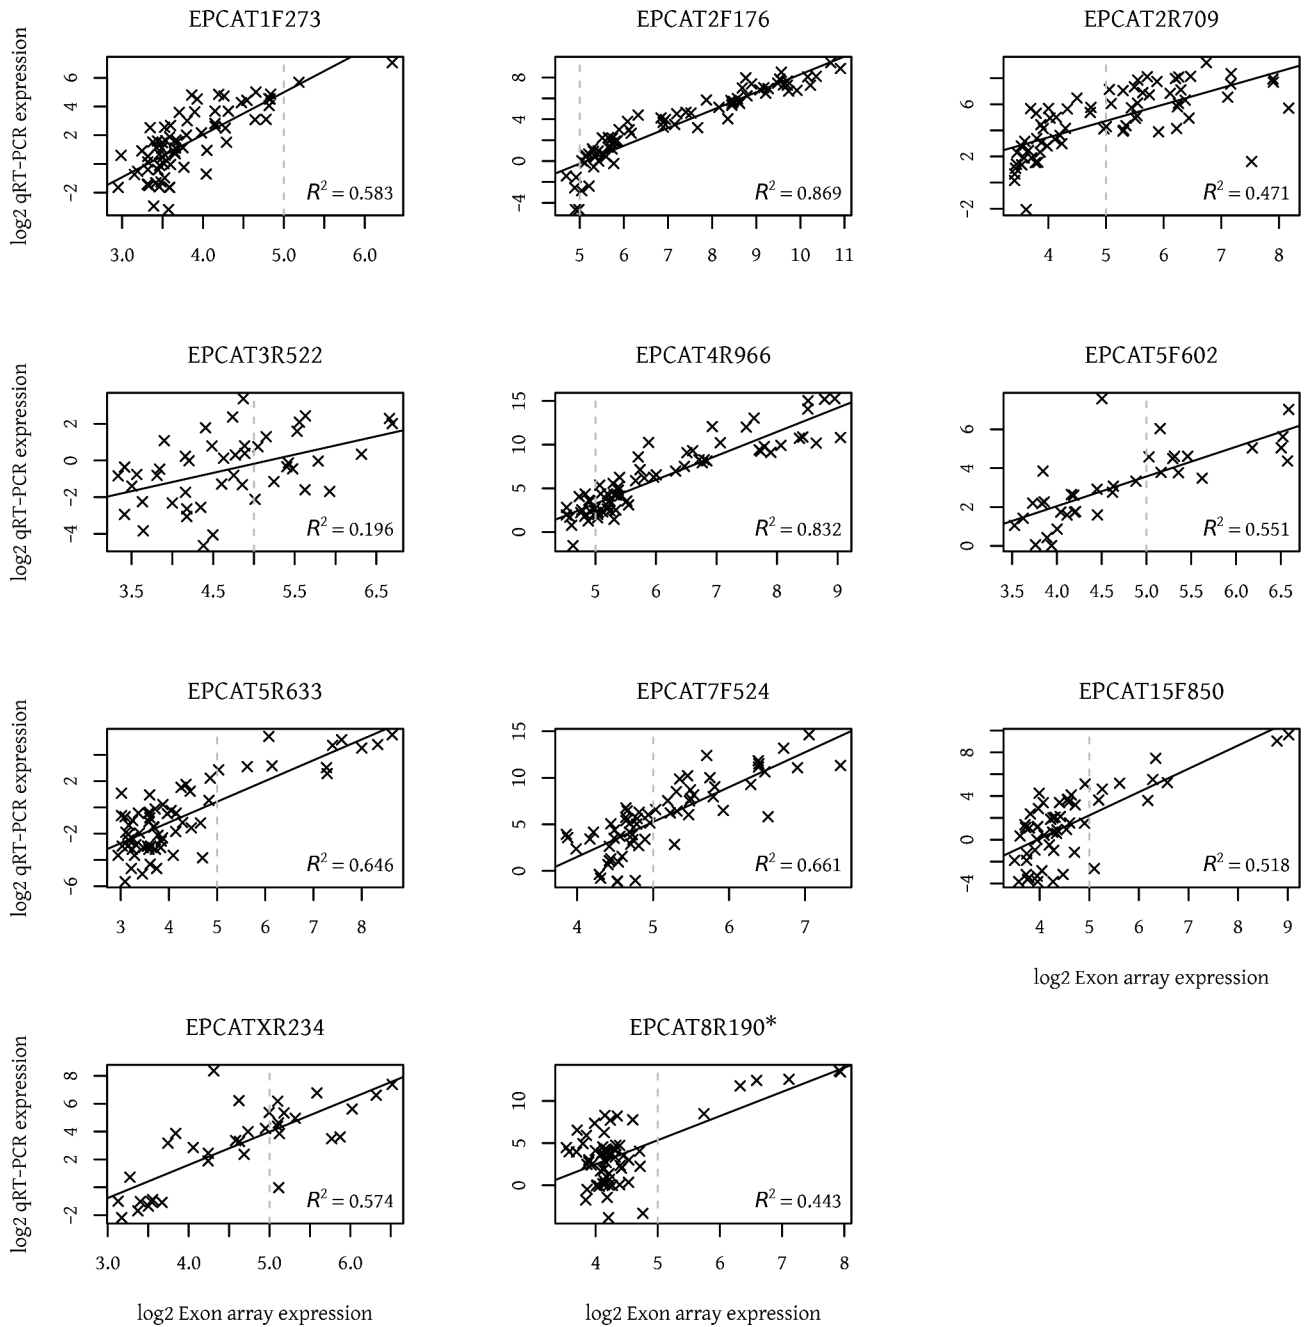

**Supplementary Figure 9: Comparison of EPCAT expression measurements between Affymetrix Exon Arrays and qRT-PCR normalized against GAPDH and HMBS for 78 samples of the ‘EMC’ dataset. Samples that showed low expression in EMC but no expression for qRT-PCR were excluded (varying for each EPCAT).**

ROC curve for 11 combined EPCATs  
EMC qRT validation set (PCa vs. NAP)

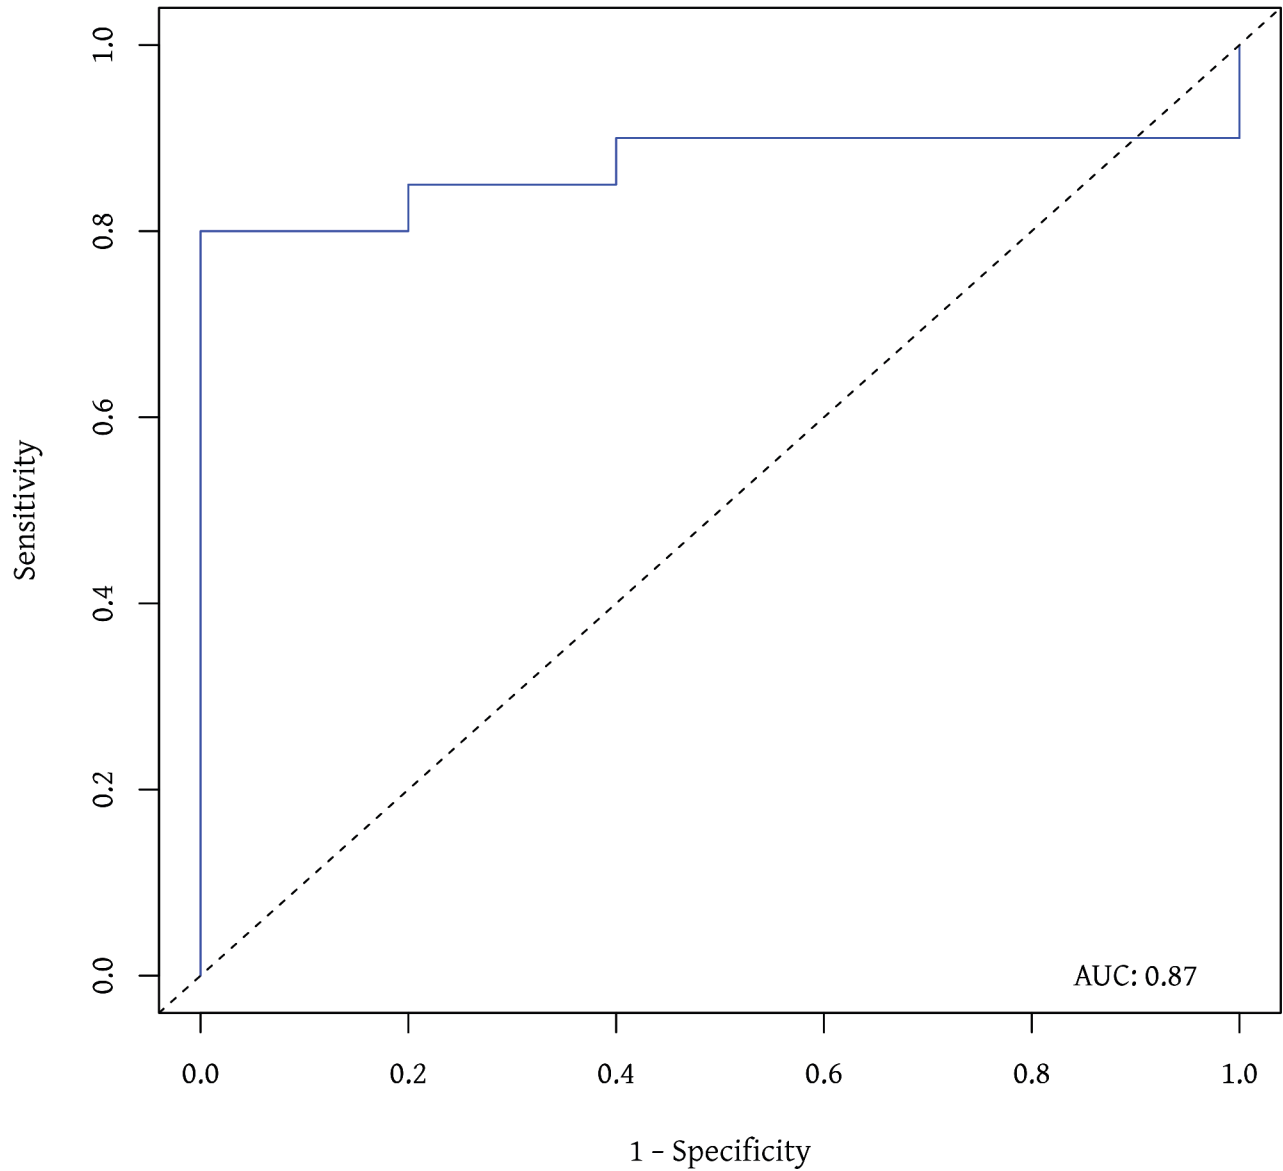

**Supplementary Figure 10: ROC curve for distinguishing PCa and NAP samples by qRT-PCR.** A diagnostic panel was created by combination of the 11 validated EPCATs on an independent patient cohort tested by qRT-PCR.

### EPCAT2F176 overall survival

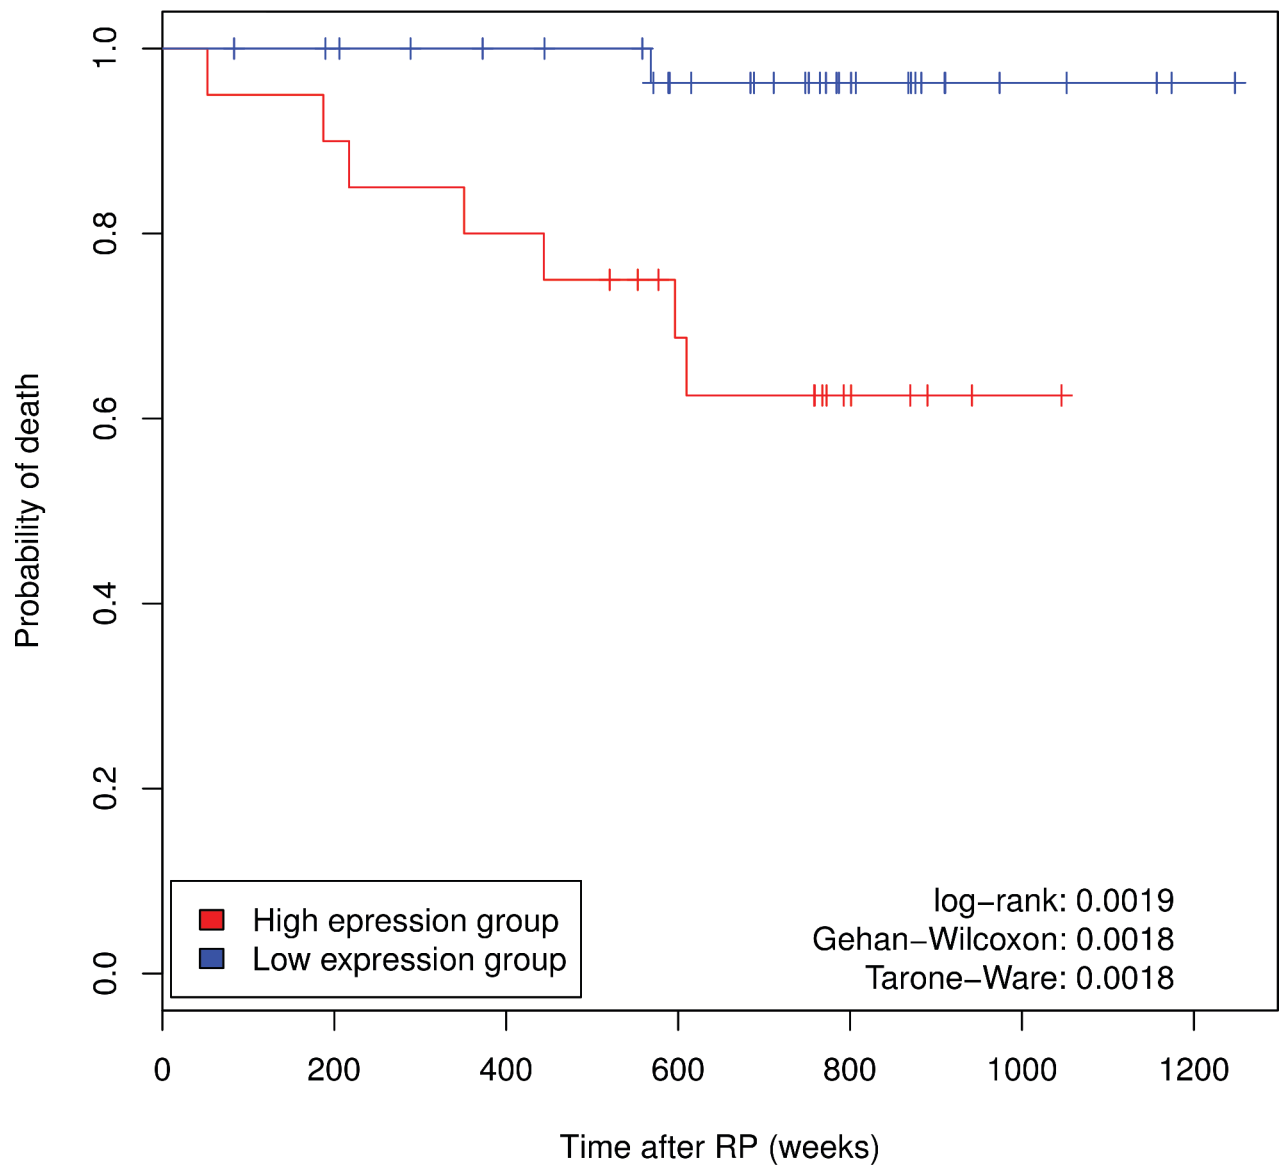

**Supplementary Figure 11: Kaplan-Meier curve of overall survival for EPCAT2F176.** Groups of high and low expression were defined by unsupervised clustering of Exon Array expression values using PAM.

### EPCAT2F176 metastasis

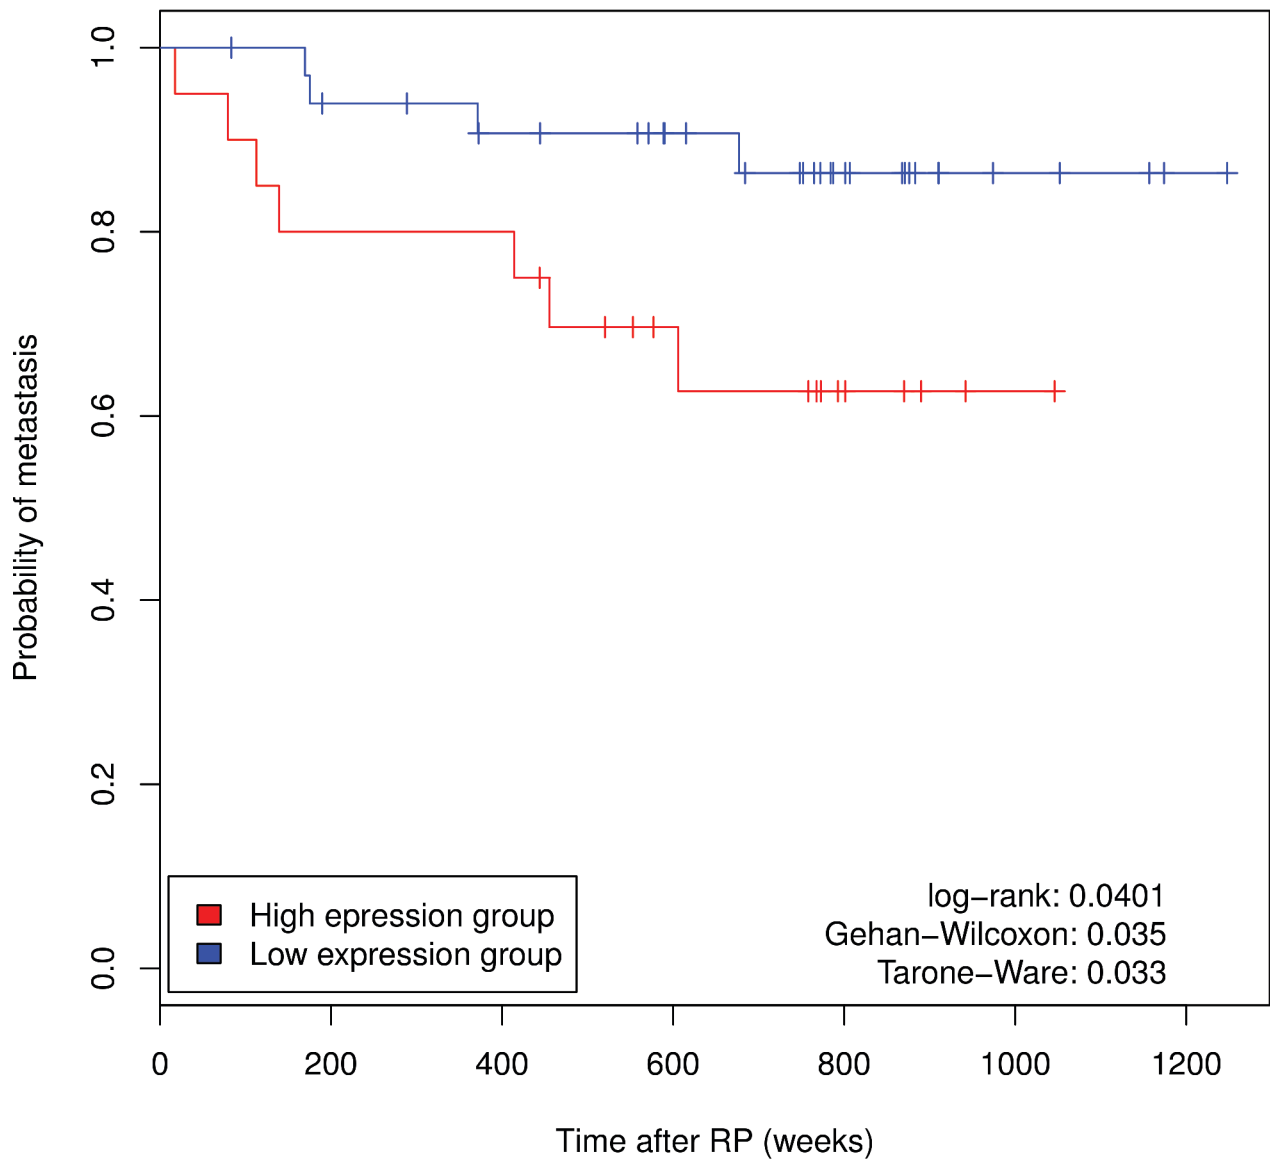

**Supplementary Figure 12: Kaplan-Meier curve of metastasis free survival for EPCAT2F176.** Groups of high and low expression were defined by unsupervised clustering of Exon Array expression values using PAM.



### EPCAT2R709 overall survival

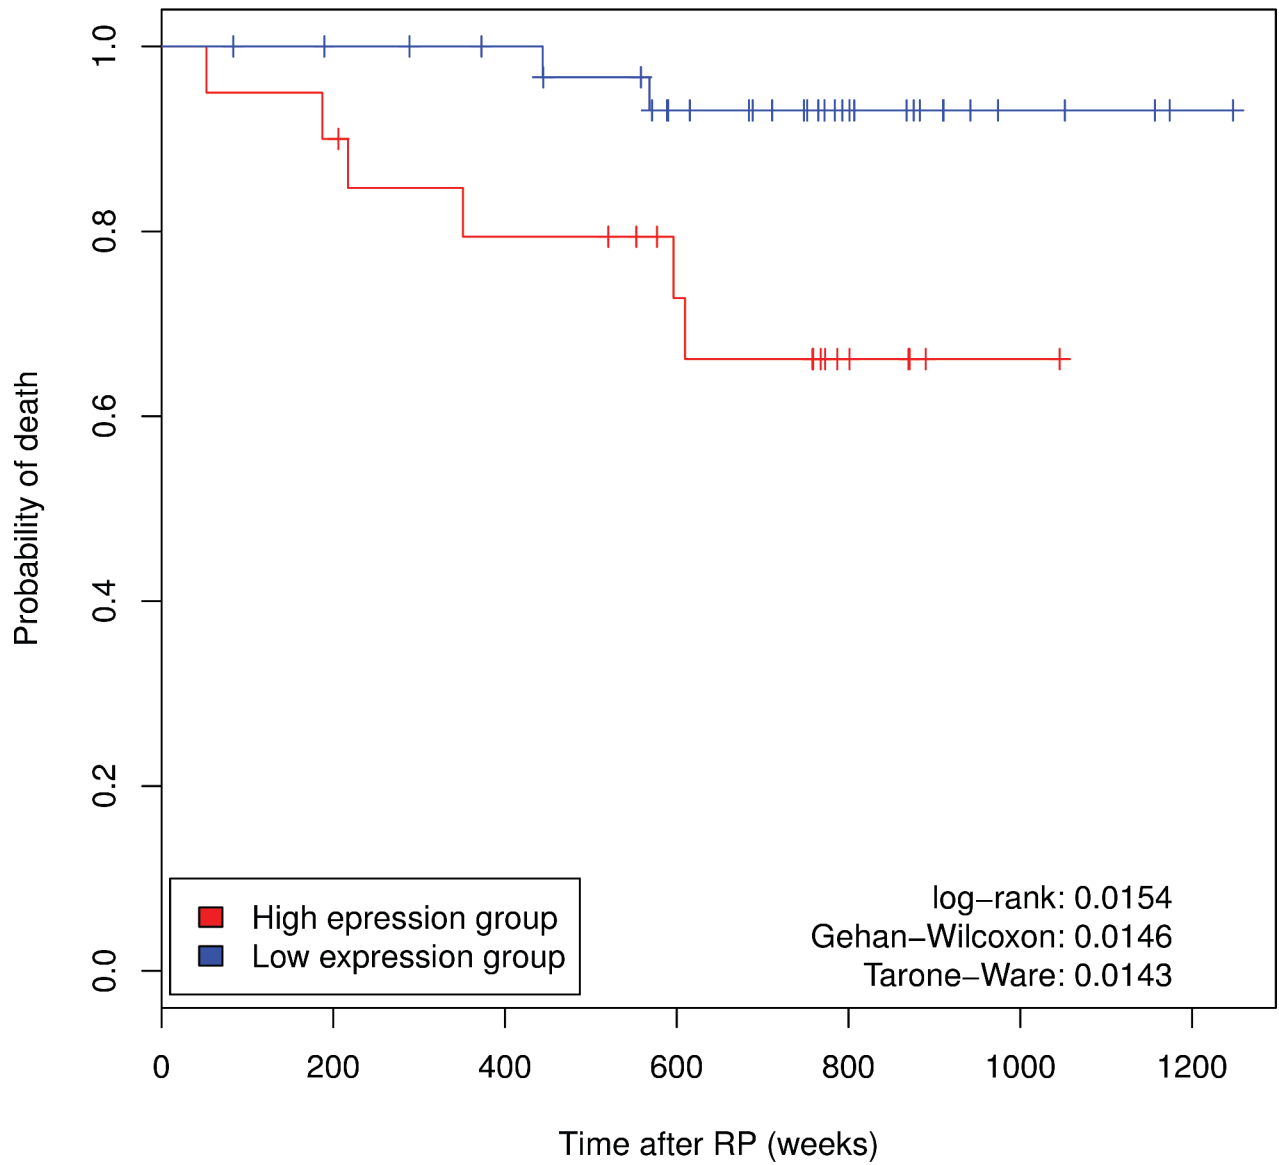

**Supplementary Figure 13: Kaplan-Meier curve of overall survival for EPCAT2R709.** Groups of high and low expression were defined by unsupervised clustering of Exon Array expression values using PAM.

### EPCAT2R709 metastasis

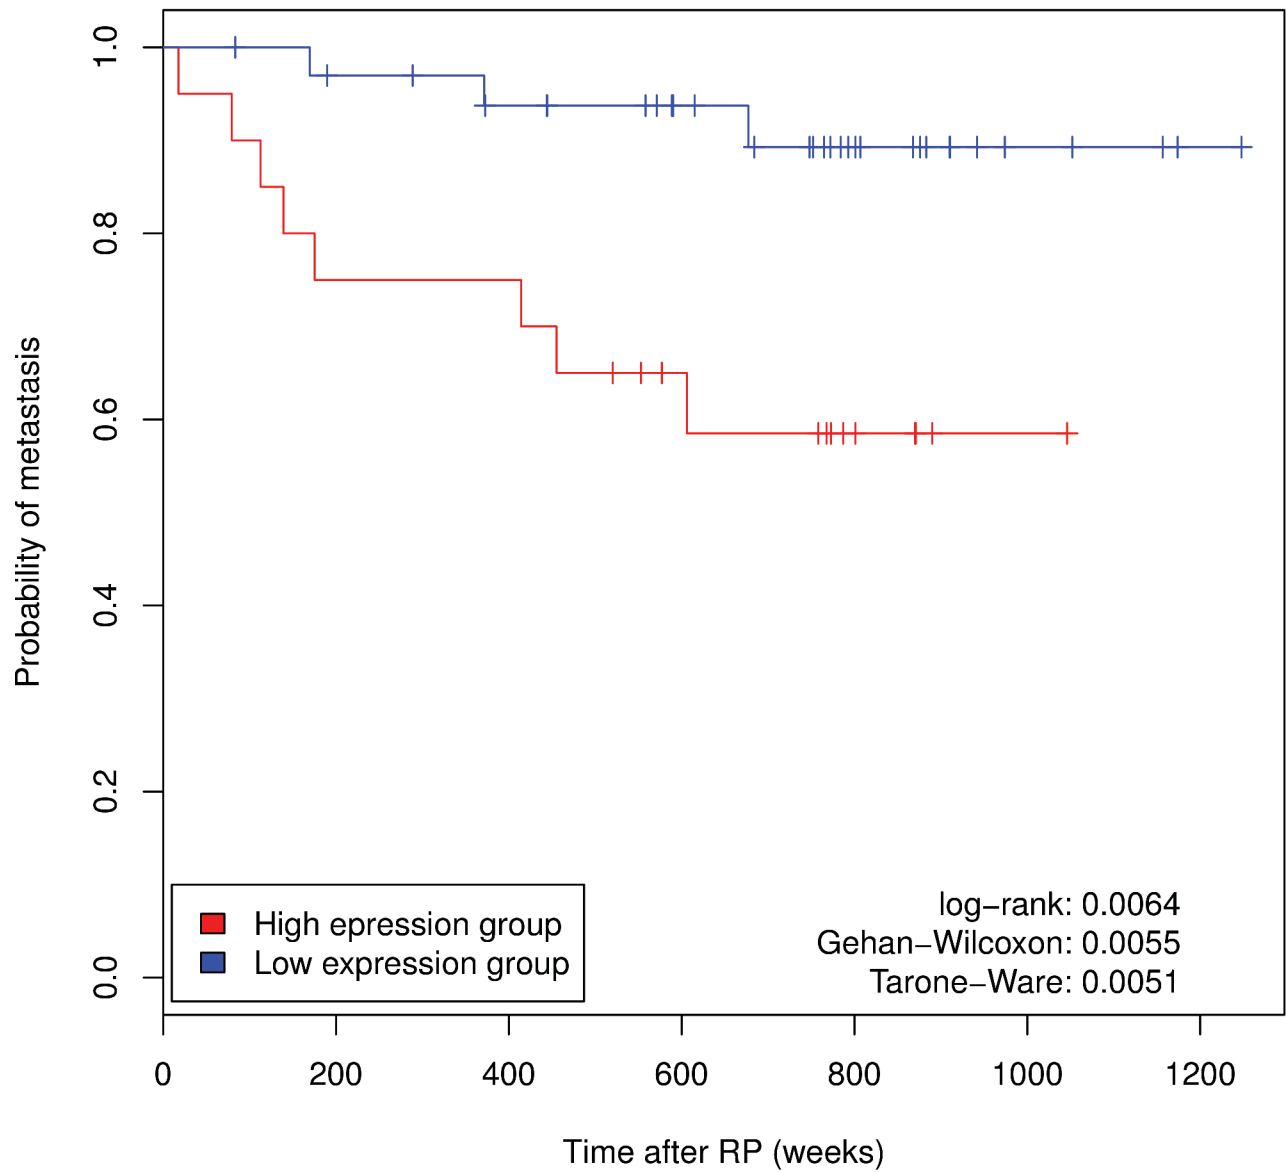

**Supplementary Figure 14: Kaplan-Meier curve of metastasis survival for EPCAT2R709.** Groups of high and low expression were defined by unsupervised clustering of Exon Array expression values using PAM.

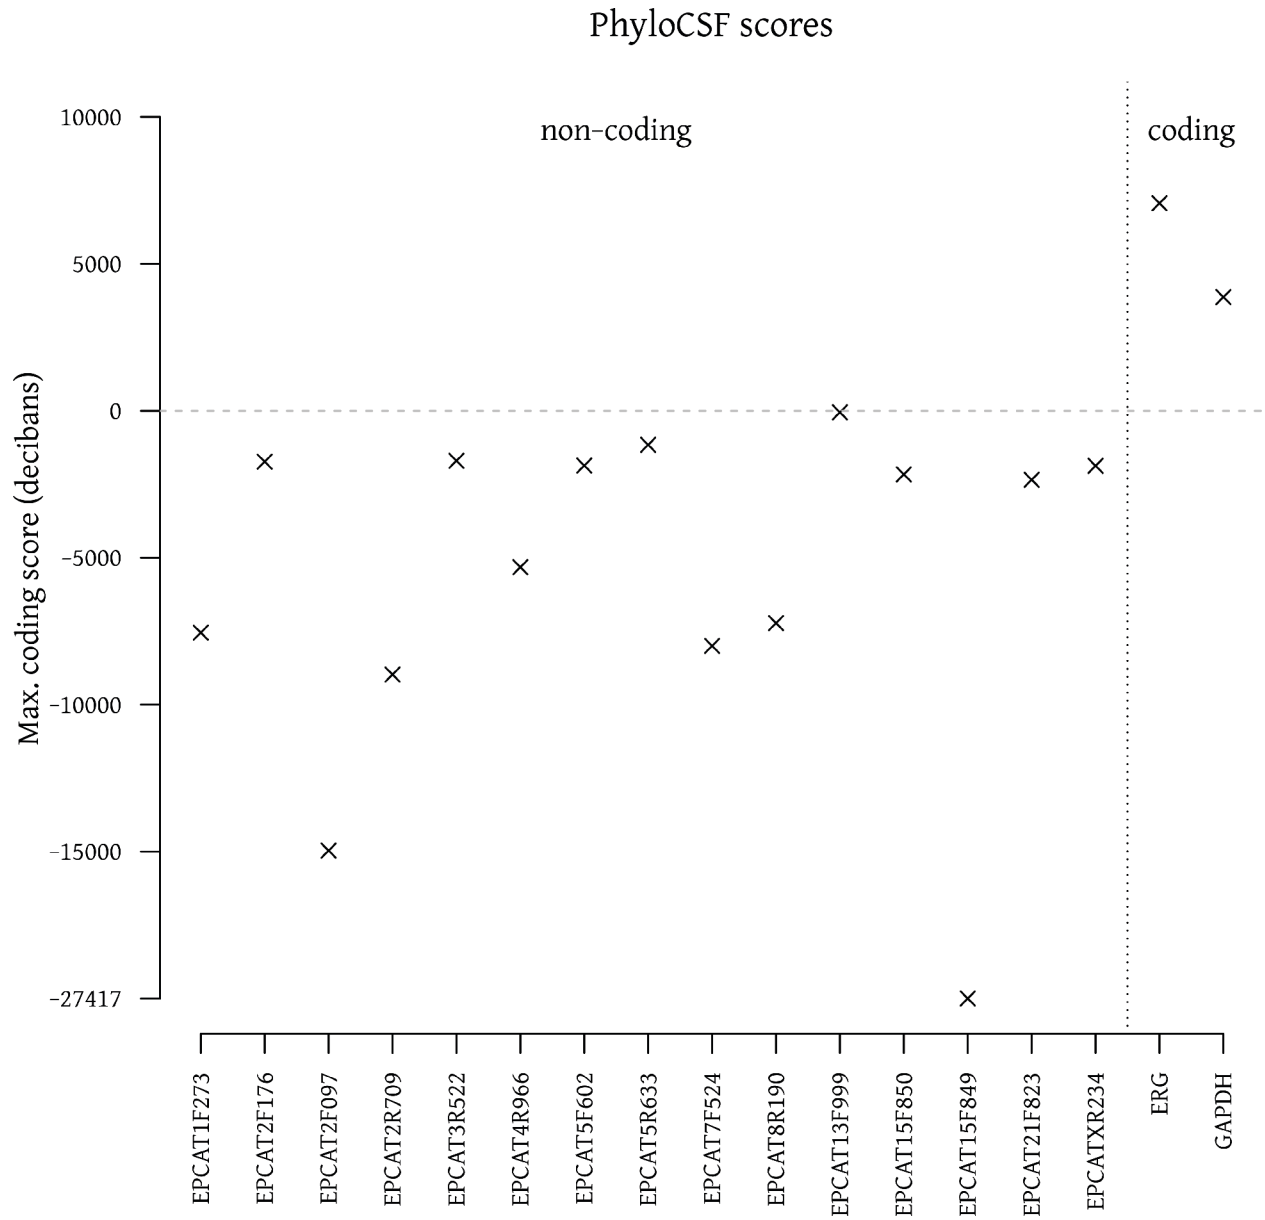

**Supplementary Figure 15: Evaluation of coding potential.** Sequences of RT-PCR validated EPCATs as well as two control genes (ERG and GAPDH) were processed with PhyloCSF after obtaining 46 way Multiz alignments to hg19 from Galaxy’s ‘Stitch Gene blocks’ tool (<http://usegalaxy.org/>). All EPCATs scored below zero, indicating no protein coding potential.

## Conservation (100 species all)

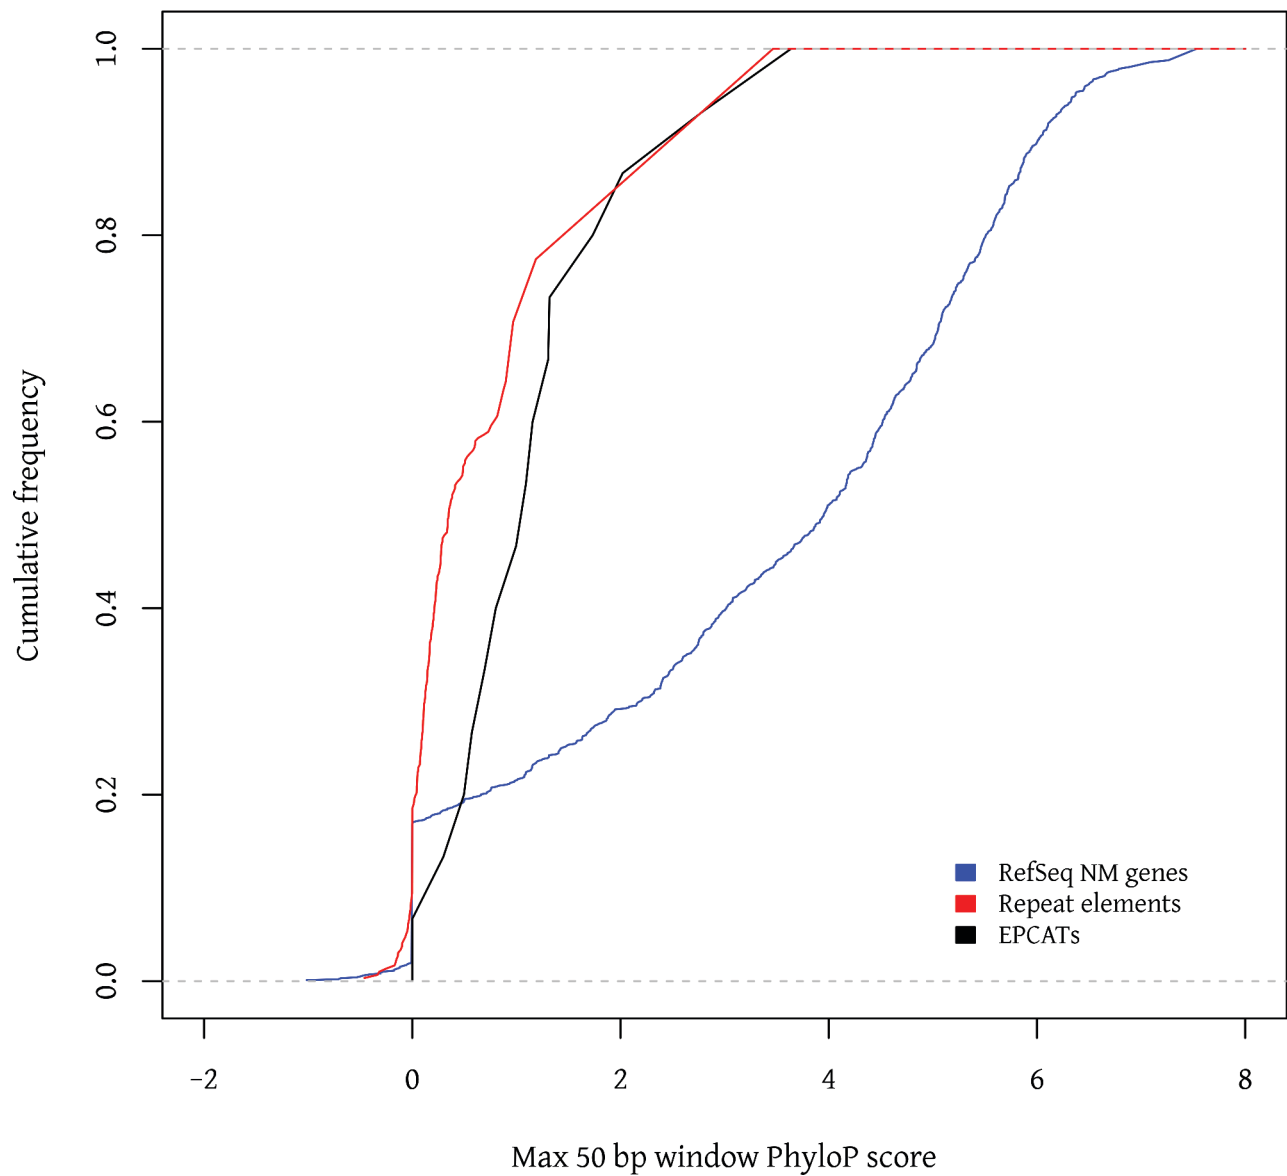

**Supplementary Figure 16: Comparison of sequence conservation of exons.** 15 RT-PCR validated EPCATs (black), 1000 protein coding (NM) RefSeq genes (blue) and 1000 randomly selected repeat elements (red) were selected. For each gene, PhyloP scores obtained from UCSC were averaged for each 50 bp window and the maximum average was used as total score.

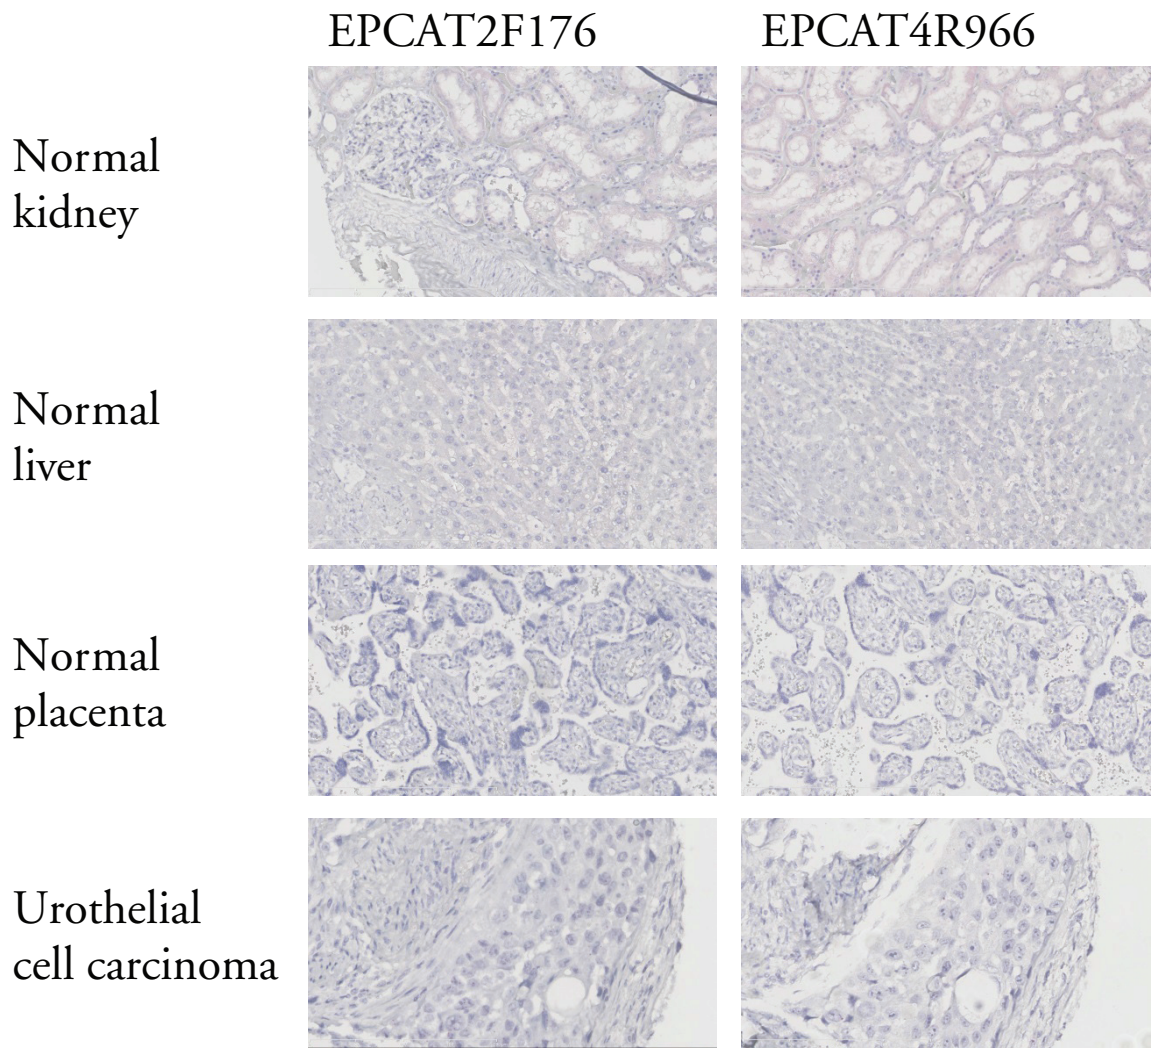

**Supplementary Figure 17: *In situ* hybridization of EPCAT2F176 and EPCAT4R966 in various control tissues (200× magnification).** All control samples were scored negative, highlighting the PCa-specific expression of both transcripts.

**Supplementary Table 1: List of genomic locations of all EPCATs, as well as involved Affymetrix Human Exon Array transcript cluster IDs**

**Supplementary Table 2: Number of samples per clinical group for each Exon Array dataset (EMC, Taylor, Brase) and both qRT-PCR cohorts**

|                     | EMC      | Taylor    | Brase    | qRT discovery | qRT validation |
|---------------------|----------|-----------|----------|---------------|----------------|
| <b>NAP</b>          | 12 (13%) | 29 (16%)  | 48 (51%) | 12 (16%)      | 5 (5%)         |
| <b>PCa</b>          | 56 (63%) | 131 (73%) | 47 (49%) | 43 (57%)      | 40 (43%)       |
| <b>TURP</b>         | 10 (11%) | -         | -        | 9 (12%)       | 43 (46%)       |
| <b>MetPCa</b>       | -        | 12 (7%)   | -        | -             | -              |
| <b>LNPCa</b>        | 12 (13%) | 7 (4%)    | -        | 11 (15%)      | 1 (1%)         |
| <b>TURP control</b> | -        | -         | -        | -             | 3 (3%)         |
| <b>LN control</b>   | -        | -         | -        | -             | 2 (2%)         |

**Supplementary Table 3: List of RT-PCR validated EPCATs in BED12 format, including structural information of exon position and length**

| Chr   | Start     | Stop      | Name        |   |   |           |           |   |    | Exon length                                                     | Exon start                                                                                 |
|-------|-----------|-----------|-------------|---|---|-----------|-----------|---|----|-----------------------------------------------------------------|--------------------------------------------------------------------------------------------|
| chr1  | 193281156 | 193868497 | EPCAT1F273  | 0 | + | 193281156 | 193868497 | 0 | 10 | 77,138,142,135,552,<br>109,93,466,96,80                         | 0,3226,37107,39078,43736,145615,<br>148092,149546,574295,587261                            |
| chr2  | 193261317 | 193410857 | EPCAT2F097  | 0 | + | 193261317 | 193410857 | 0 | 12 | 95,87,99,126,181,<br>208,130,55,1497,<br>181,69,165             | 0,3572,17066,34776,60829,61379<br>,61671,69088,70281,73742,7436<br>5,149375                |
| chr2  | 181556870 | 181692235 | EPCAT2F176  | 0 | + | 181556870 | 181692235 | 0 | 4  | 299,95,101,267                                                  | 0,32453,33048,135098                                                                       |
| chr2  | 180981253 | 181436558 | EPCAT2R709  | 0 | - | 180981253 | 181436558 | 0 | 8  | 1050,107,95,273,<br>118,68,31,119                               | 0,2641,6807,24779,450504,451551,<br>452604,455186                                          |
| chr3  | 80679057  | 80819475  | EPCAT3R522  | 0 | - | 80679057  | 80819475  | 0 | 6  | 349,56,144,156,115,565                                          | 0,1325,3909,3909,131552,139853                                                             |
| chr4  | 169980608 | 169993351 | EPCAT4R966  | 0 | - | 169980608 | 169993351 | 0 | 4  | 714,158,104,172                                                 | 0,1964,11188,12571                                                                         |
| chr5  | 164775904 | 165205079 | EPCAT5F602  | 0 | + | 164775904 | 165205079 | 0 | 3  | 152,132,97                                                      | 0,113472,429078                                                                            |
| chr5  | 70642416  | 70742616  | EPCAT5R633  | 0 | - | 70642416  | 70742616  | 0 | 4  | 326,227,144,87                                                  | 0,7107,99056,100113                                                                        |
| chr7  | 26590351  | 26594538  | EPCAT7F524  | 0 | + | 26590351  | 26594538  | 0 | 2  | 1478,11                                                         | 0,4077                                                                                     |
| chr8  | 54307025  | 54321348  | EPCAT8R190  | 0 | - | 54307025  | 54321348  | 0 | 6  | 1291,82,267,89,97,89                                            | 0,1434,5105,7015,11333,14234                                                               |
| chr13 | 55014817  | 55015411  | EPCAT13F999 | 0 | + | 55014817  | 55015411  | 0 | 2  | 95,1                                                            | 0,494                                                                                      |
| chr15 | 69917267  | 70112407  | EPCAT15F849 | 0 | + | 69917267  | 70112407  | 0 | 14 | 264,197,181,94,145,2863,<br>72,1230,193,755,138,50,1<br>095,173 | 0,3811,46798,52618,59369,70739,7<br>4885,77981,90658,96666,127450,1<br>31228,161320,194967 |
| chr15 | 21082731  | 21101386  | EPCAT15F850 | 0 | + | 21082731  | 21101386  | 0 | 3  | 717,143,3326                                                    | 0,9611,15329                                                                               |
| chr21 | 39875488  | 39877234  | EPCAT21F823 | 0 | + | 39875488  | 39877234  | 0 | 2  | 425,106                                                         | 0,164                                                                                      |
| chrX  | 93655065  | 93738198  | EPCATXR234  | 0 | - | 93655065  | 93738198  | 0 | 4  | 438,133,1074,3004                                               | 0,2022,14508,80129                                                                         |

**Supplementary Table 4a: Results of bootstrapping analysis for association of RT-PCR validated EPCAT expression (low vs. high) and clinical outcome based on EMC Exon Array dataset**

| Bootstrapping<br>term association | EMC <i>p</i> -value |            |            | Taylor <i>p</i> -value |            |           |
|-----------------------------------|---------------------|------------|------------|------------------------|------------|-----------|
|                                   | PSA-<br>progression | metastasis | PCa-death  | PSA-<br>progression    | metastasis | PCa-death |
| EPCAT1F273                        | 0.4570543           | 0.94020598 | 0.85891411 | 0.1266873              | 1          | 1         |
| EPCAT2F176                        | 0.5065493           | 0.04769523 | 0.00249975 | 0.7551245              | 1          | 1         |
| EPCAT2F097                        | 0.9261074           | 1          | 1          | 0.2769723              | 0.6457354  | 1         |
| EPCAT2R709                        | 0.4966503           | 0.00789921 | 0.02429757 | 0.3993601              | 0.4175582  | 1         |
| EPCAT3R522                        | 0.6063394           | 0.59064094 | 0.85111489 | 0.9915008              | 1          | 1         |
| EPCAT4R966                        | 0.8870113           | 0.40435956 | 0.52674733 | 0.8569143              | 1          | 1         |
| EPCAT5F602                        | 0.970303            | 0.60613939 | 0.4759524  | 0.1637836              | 1          | 1         |
| EPCAT5R633                        | 0.6109389           | 0.50454955 | 0.38276172 | 0.8578142              | 0.7067293  | 1         |
| EPCAT7F524                        | 0.2058794           | 0.94160584 | 1          | 0.2811719              | 0.490051   | 1         |
| EPCAT8R190                        | 0.9008099           | 0.71812819 | 0.06729327 | 0.4649535              | 0.3111689  | 1         |
| EPCAT13F999                       | 0.3454655           | 0.19058094 | 0.57334267 | 0.7325267              | 0.7865213  | 1         |
| EPCAT15F850                       | 0.8153185           | 1          | 1          | 0.4027597              | 1          | 1         |
| EPCAT15F849                       | 0.9455054           | 0.65773423 | 0.56344366 | 0.879712               | 0.5333467  | 1         |
| EPCAT21F823                       | 0.1814819           | 0.31556844 | 0.58714129 | 0.4242576              | 0.1250875  | 1         |
| EPCATXR234                        | 0.5273473           | 0.92060794 | 0.99070093 | 0.7085291              | 0.590141   | 1         |

**Supplementary Table 4b: Results of Kaplan-Meier analysis for RT-PCR validated EPCAT expression (low vs. high) and association with biochemical recurrence/PSA-progression based on EMC Exon Array dataset**

| Kaplan-Meier PSA-progression | Log-rank | Gehan-Wilcoxon | Tarone-Ware |
|------------------------------|----------|----------------|-------------|
| EPCAT1F273                   | 0.822304 | 0.840066       | 0.863782    |
| EPCAT2F176                   | 0.55431  | 0.508751       | 0.501267    |
| EPCAT2F097                   | 0.355493 | 0.341533       | 0.338199    |
| EPCAT2R709                   | 0.65968  | 0.623281       | 0.61945     |
| EPCAT3R522                   | 0.906851 | 0.942022       | 0.931266    |
| EPCAT4R966                   | 0.479322 | 0.713114       | 0.818175    |
| EPCAT5F602                   | 0.229042 | 0.327943       | 0.389935    |
| EPCAT5R633                   | 0.492762 | 0.496482       | 0.512629    |
| EPCAT7F524                   | 0.45515  | 0.65948        | 0.782489    |
| EPCAT8R190                   | 0.509915 | 0.656146       | 0.746741    |
| EPCAT13F999                  | 0.220446 | 0.14333        | 0.125925    |
| EPCAT15F850                  | 0.747927 | 0.714793       | 0.692413    |
| EPCAT15F849                  | 0.207135 | 0.277104       | 0.306061    |
| EPCAT21F823                  | 0.31564  | 0.280606       | 0.276468    |
| EPCATXR234                   | 0.731864 | 0.536802       | 0.446988    |
| pre-operative PSA            | 0.000019 | 0.000022       | 0.000024    |
| pT-stage                     | 0.000446 | 0.001039       | 0.001902    |
| Gleason score                | 0.05253  | 0.060306       | 0.065992    |



**Supplementary Table 4c: Results of Kaplan-Meier analysis for RT-PCR validated EPCAT expression (low vs. high) and association with development of clinical metastases based on EMC Exon Array dataset**

| Kaplan-Meier metastasis | Log-rank | Gehan-Wilcoxon | Tarone-Ware |
|-------------------------|----------|----------------|-------------|
| EPCAT1F273              | 0.286744 | 0.283816       | 0.282656    |
| EPCAT2F176              | 0.0401   | 0.035044       | 0.032952    |
| EPCAT2F097              | 0.365511 | 0.367244       | 0.368998    |
| EPCAT2R709              | 0.006432 | 0.005475       | 0.005127    |
| EPCAT3R522              | 0.834723 | 0.76509        | 0.730381    |
| EPCAT4R966              | 0.610612 | 0.606326       | 0.604812    |
| EPCAT5F602              | 0.955955 | 0.995627       | 0.971211    |
| EPCAT5R633              | 0.631468 | 0.695954       | 0.728961    |
| EPCAT7F524              | 0.280833 | 0.28485        | 0.287111    |
| EPCAT8R190              | 0.914835 | 0.987247       | 0.938661    |
| EPCAT13F999             | 0.210626 | 0.228604       | 0.237991    |
| EPCAT15F850             | 0.481605 | 0.482749       | 0.484056    |
| EPCAT15F849             | 0.825059 | 0.82339        | 0.823735    |
| EPCAT21F823             | 0.486802 | 0.477063       | 0.47403     |
| EPCATXR234              | 0.302095 | 0.286277       | 0.27888     |
| pre-operative PSA       | 0.000019 | 0.000022       | 0.000024    |
| pT-stage                | 0.09705  | 0.092336       | 0.090815    |
| Gleason score           | 0.005366 | 0.002211       | 0.00143     |

**Supplementary Table 4d: Results of Kaplan-Meier analysis for RT-PCR validated EPCAT expression (low vs. high) and association with PCa-related death based on EMC Exon Array dataset**

| Kaplan-Meier PCa-death | Log-rank | Gehan-Wilcoxon | Tarone-Ware |
|------------------------|----------|----------------|-------------|
| EPCAT1F273             | 0.503146 | 0.488821       | 0.481851    |
| EPCAT2F176             | 0.001911 | 0.001844       | 0.001826    |
| EPCAT2F097             | 0.439962 | 0.440863       | 0.441762    |
| EPCAT2R709             | 0.015405 | 0.014596       | 0.014256    |
| EPCAT3R522             | 0.409329 | 0.369127       | 0.350838    |
| EPCAT4R966             | 0.792452 | 0.787311       | 0.786213    |
| EPCAT5F602             | 0.74914  | 0.819185       | 0.853669    |
| EPCAT5R633             | 0.426692 | 0.50241        | 0.541343    |
| EPCAT7F524             | 0.138912 | 0.139654       | 0.140402    |
| EPCAT8R190             | 0.074398 | 0.071246       | 0.069917    |
| EPCAT13F999            | 0.774196 | 0.782848       | 0.785502    |
| EPCAT15F850            | 0.533521 | 0.534234       | 0.534993    |
| EPCAT15F849            | 0.959957 | 0.972428       | 0.977337    |
| EPCAT21F823            | 0.885101 | 0.864576       | 0.855339    |
| EPCATXR234             | 0.091736 | 0.091129       | 0.091002    |
| pre-operative PSA      | 0.000019 | 0.000022       | 0.000024    |
| pT-stage               | 0.081183 | 0.080368       | 0.080263    |
| Gleason score          | 0.000501 | 0.00026        | 0.00019     |

**Supplementary Table 5a: Information on clinical follow-up for all four tissue microarrays used for *in situ* hybridization**

| TMA                                   | TMA1                        | TMA2 (normal prostate)      | TMA3 (LNPCa)                | TMA4 (CRPC)                 |
|---------------------------------------|-----------------------------|-----------------------------|-----------------------------|-----------------------------|
| <b>Clinico-pathological parameter</b> | Mean (median; IQR) or n (%) | Mean (median; IQR) or n (%) | Mean (median; IQR) or n (%) | Mean (median; IQR) or n (%) |
| <b>Age (years)</b>                    | 64.9 (65.4; 62–68)          | 66 (66; 62 – 73)            | 62.5 (65; 61.5–67.8)        | 70.4 (71; 64.6–75.3)        |
| <b>PSA level (ng/ml)</b>              |                             |                             |                             |                             |
| Total                                 | 7.35 (5.2; 3.7–7.8)         | -                           | 39.89 (24.7; 11 – 50.8)     | 67.77 (13.45; 7.25 – 31.25) |
| ≤ 10 ng/ml                            | 366 (88%)                   | -                           | 22 (19%)                    | 34 (28%)                    |
| > 10 ng/ml                            | 52 (12%)                    | -                           | 74 (62%)                    | 60 (50%)                    |
| Unknown                               | -                           | -                           | 23 (19%)                    | 26 (22%)                    |
| <b>Follow-up (months)</b>             | 116.8 (112; 87.2–136.4)     | -                           | No follow-up registered     | No follow-up registered     |
| <b>Gleason sum</b>                    |                             |                             |                             |                             |
| < 7                                   | 217 (52%)                   | -                           | 4 (4%)                      | 2 (2%)                      |
| 7                                     | 173 (41%)                   | -                           | 65 (58%)                    | 7 (6%)                      |
| 3 + 4                                 | 141 (34%)                   | -                           | -                           | -                           |
| 4 + 3                                 | 32 (7%)                     | -                           | -                           | -                           |
| > 7                                   | 28 (7%)                     | -                           | 43 (38%)                    | 40 (33%)                    |
| Unknown                               | -                           | -                           | -                           | 71 (59%)                    |
| <b>pT-stage (TNM 2002)</b>            |                             |                             |                             |                             |
| T2                                    | 292 (70%)                   | -                           | 3 (2,5%)                    | -                           |
| T3a                                   | 84 (20%)                    | -                           | 3 (2,5%)                    | -                           |
| T3b                                   | 17 (4%)                     | -                           | 1 (0,8%)                    | -                           |
| T4                                    | 25 (6%)                     | -                           | 1 (0,8%)                    | -                           |
| Unknown                               | -                           | -                           | 111 (93,3%)                 | -                           |
| <b>Lymph node metastasis</b>          |                             |                             |                             |                             |
| Yes                                   | 1 (0%)                      | -                           | 119 (100%)                  | -                           |
| No                                    | 417 (100%)                  | -                           | -                           | -                           |
| <b>Surgical margins</b>               |                             |                             |                             |                             |
| Positive                              | 110 (26%)                   | -                           | -                           | -                           |
| Negative                              | 308 (74%)                   | -                           | -                           | -                           |
| <b>Biochemical recurrence</b>         |                             |                             |                             |                             |
| Yes                                   | 107 (26%)                   | -                           | 1 (1%)                      | -                           |
| No                                    | 311 (74%)                   | -                           | -                           | -                           |
| Unknown                               | -                           | -                           | 118 (99%)                   | -                           |

(Continued)

| TMA                               | TMA1      | TMA2 (normal prostate) | TMA3 (LNPCa) | TMA4 (CRPC) |
|-----------------------------------|-----------|------------------------|--------------|-------------|
| <b>Development of metastasis</b>  |           |                        |              |             |
| Yes                               | 20 (5%)   | -                      | 41 (35%)     | -           |
| No                                | 398 (95%) | -                      | 11 (9%)      | -           |
| Unknown                           | -         | -                      | 67 (56%)     | -           |
| <b>Overall death</b>              |           |                        |              |             |
| Yes                               | 97 (23%)  | -                      | 64 (54%)     | 51 (42%)    |
| No                                | 320 (77%) | -                      | 51 (43%)     | 44 (37%)    |
| Unknown                           | -         | -                      | 4 (3%)       | 25 (21%)    |
| <b>Death from prostate cancer</b> |           |                        |              |             |
| Yes                               | 11 (3%)   | -                      | 44 (39%)     | 6 (5%)      |
| No                                | 130 (31%) | -                      | 63 (55%)     | 4 (3%)      |
| Unknown                           | 277 (66%) | -                      | 38 (6%)      | 110 (92%)   |
| <b>Hormonal status</b>            |           |                        |              |             |
| hormone refractory                | -         | -                      | -            | 65 (54%)    |
| hormone sensitive                 | -         | -                      | -            | 55 (46%)    |
| RCP                               | -         | 48 (38%)               | -            | -           |
| TE                                | -         | 5 (4%)                 | -            | -           |
| TURP                              | -         | 74 (58%)               | -            | -           |

RCP – Radical cystoprostatectomy.

TE – Total pelvic exenteration.

TURP – Transurethral resection of the prostate.

**Supplementary Table 5b: Information on clinical follow-up for the EMC Exon Array dataset, as well as both qRT-PCR cohorts**

|                                       | EMC (Exon Array)            | EMC discovery (qRT-PCR)     | EMC validation (qRT-PCR)    |
|---------------------------------------|-----------------------------|-----------------------------|-----------------------------|
| <b>Clinico-pathological parameter</b> | Mean (median; IQR) or n (%) | Mean (median; IQR) or n (%) | Mean (median; IQR) or n (%) |
| <b>Age (years)</b>                    | 63.18 (63.5; 58–67)         | 63.36 (64; 58–67)           | 68.17 (67; 61–75)           |
| <b>PSA level (ng/ml)</b>              |                             |                             |                             |
| Total                                 | 23.37 (10.5; 5.95–19.3)     | 25.55 (11; 6–20.7)          | 23.25 (11.25; 5.5–23.85)    |
| ≤ 10ng/ml                             | 35 (40%)                    | 29 (38%)                    | 23 (27%)                    |
| > 10ng/ml                             | 36 (41%)                    | 32 (43%)                    | 25 (24%)                    |
| Unknown                               | 16 (18%)                    | 14 (19%)                    | 46 (49%)                    |
| <b>Follow-up (months)</b>             | 124.63 (124; 89–157)        | 122.56 (126.5; 82.25–159.5) | 126.34 (127; 90.5–154.75)   |
| <b>Gleason sum</b>                    |                             |                             |                             |
| < 7                                   | 36 (41%)                    | 28 (37%)                    | 34 (36%)                    |
| 7                                     | 16 (18%)                    | 13 (17%)                    | 16 (17%)                    |
| 3 + 4                                 | 8 (9%)                      | 7 (9%)                      | 6 (6%)                      |
| 4 + 3                                 | 6 (7%)                      | 4 (5%)                      | 8 (9%)                      |
| > 7                                   | 23 (27%)                    | 22 (30%)                    | 27 (29%)                    |
| Unknown                               | 12 (14%)                    | 12 (16%)                    | 17 (18%)                    |
| <b>pT-stage (TNM 2002)</b>            |                             |                             |                             |
| T2                                    | 23 (27%)                    | 20 (27%)                    | 15 (16%)                    |
| T3a                                   | 16 (18%)                    | 14 (19%)                    | 6 (6%)                      |
| T3b + c                               | 15 (17%)                    | 11 (14%)                    | 17 (18%)                    |
| T4                                    | 12 (14%)                    | 10 (13%)                    | 6 (6%)                      |
| Unknown                               | 21 (24%)                    | 20 (27%)                    | 50 (53%)                    |
| <b>Lymph node metastasis</b>          |                             |                             |                             |
| Yes                                   | 12 (14%)                    | 11 (15%)                    | 1 (1%)                      |
| No                                    | 78 (86%)                    | 64 (85%)                    | 93 (99%)                    |
| <b>Surgical margins</b>               |                             |                             |                             |
| Positive                              | 25 (29%)                    | 20 (27%)                    | 17 (18%)                    |
| Negative                              | 26 (41%)                    | 20 (27%)                    | 15 (16%)                    |
| Unknown                               | 36 (30%)                    | 35 (46%)                    | 62 (66%)                    |
| <b>Biochemical recurrence</b>         |                             |                             |                             |
| Yes                                   | 45 (52%)                    | 39 (52%)                    | 34 (36%)                    |
| No                                    | 41 (47%)                    | 35 (47%)                    | 52 (55%)                    |
| Unknown                               | 1 (1%)                      | 1 (1%)                      | 8 (9%)                      |
| <b>Development of metastasis</b>      |                             |                             |                             |
| Yes                                   | 19 (22%)                    | 18 (24%)                    | 19 (20%)                    |
| No                                    | 67 (77%)                    | 56 (75%)                    | 67 (71%)                    |
| Unknown                               | 1 (1%)                      | 1 (1%)                      | 8 (9%)                      |

**Supplementary Table 6: Number of tissue microarray samples showing expression (positive) for one EPCAT after *in situ* hybridization. CRPC +: hormone refractory PCa. CRPC -: hormone sensitive PCa**

| EPCAT             | Sample group        | TMA1 (PCa) | TMA2 (normal prostate) | TMA3 (LNPCa) | TMA4 (CRPC)  |
|-------------------|---------------------|------------|------------------------|--------------|--------------|
| <b>EPCAT2F176</b> | total samples       | 418        | 127                    | 119          | 120          |
|                   | containing tumor    | 374        | 0                      | 73           | 109          |
|                   | positive (CRPC +/-) | 107        | 0                      | 46           | 61 (34 / 27) |
|                   | Negative (CRPC +/-) | 267        | 127                    | 27           | 48 (23 / 25) |
| <b>EPCAT4R966</b> | total samples       | 418        | 127                    | 119          | 120          |
|                   | containing tumor    | 396        | 0                      | 71           | 103          |
|                   | positive (CRPC +/-) | 111        | 0                      | 16           | 41 (26 / 15) |
|                   | negative (CRPC +/-) | 285        | 127                    | 55           | 62 (28 / 34) |

**Supplementary Table 7a: Kaplan-Meier results for two EPCATs based on TMA1 and TMA4 (CRPC). Association with clinical parameters was performed after quantification of *in situ* hybridisation**

|                              | PSA at diagnosis (> 10 vs < 10) | Gleason RP | Surg. Margins | pT-stage | CRPC  |
|------------------------------|---------------------------------|------------|---------------|----------|-------|
| <b>EPCAT2F176 (pos/neg)</b>  |                                 |            |               |          |       |
| Pearson Chi-Square           | 0.49                            | 0.368      | 0.555         | 0.004    | 0.417 |
| Likelihood Ratio             | 0.497                           | 0.372      | 0.553         | 0.005    | 0.417 |
| Linear-by-Linear Association | 0.242                           | 0.158      | 0.555         | 0.024    | 0.419 |
| <b>EPCAT4R966 (pos/neg)</b>  |                                 |            |               |          |       |
| Pearson Chi-Square           | 0.938                           | 0.289      | 0.346         | 0.039    | 0.69  |
| Likelihood Ratio             | 0.938                           | 0.289      | 0.0342        | 0.042    | 0.68  |
| Linear-by-Linear Association | 0.938                           | 0.125      | 0.346         | 0.643    | 0.71  |

**Supplementary Table 7b: Cox regression results for EPCAT4R966 based on TMA1, association with clinical parameters was performed after quantification of *in situ* hybridisation**

| Cox regression          |                     |                 |                     |                 |
|-------------------------|---------------------|-----------------|---------------------|-----------------|
| EPCAT4R966 (pos/neg)    | univariate          |                 | multivariate        |                 |
| BCR                     | HR (95% CI)         | <i>p</i> -value | HR (95% CI)         | <i>p</i> -value |
| Age                     | 1.05 (1.00–1.09)    | 0.04            | 1.03 (0.98–1.07)    | 0.21            |
| PSA                     | 3.51 (2.34–5.26)    | < 0.01          | 1.79 (1.13–2.84)    | 0.03            |
| Gleason score           | 2.47 (1.89–3.26)    | < 0.01          | 1.82 (1.34–2.46)    | < 0.01          |
| pT-stage                | 1.72 (1.46–2.02)    | < 0.01          | 1.25 (1.03–1.52)    | 0.03            |
| Surgical margin         | 3.29 (2.29–4.71)    | < 0.01          | 2.33 (1.59–3.41)    | < 0.01          |
| EPCAT4R966              | 1.236 (0.819–1.864) | 0.319           | 1.174 (0.775–1.778) | 0.448           |
| <b>local recurrence</b> |                     |                 |                     |                 |
| Age                     | 0.96 (0.87–1.05)    | 0.36            | 0.92 (0.84–1.02)    | 0.13            |
| PSA                     | 2.28 (0.83–6.22)    | 0.11            | 0.96 (0.30–3.10)    | 0.95            |
| Gleason sum             | 2.55 (1.35–4.82)    | < 0.01          | 2.08 (1.07–4.05)    | 0.03            |
| pT-stage                | 1.60 (1.10–2.35)    | 0.02            | 1.21 (0.78–1.87)    | 0.39            |
| Surgical margin         | 4.10 (1.73–9.75)    | < 0.01          | 3.27 (1.34–7.95)    | 0.01            |
| EPCAT4R966              | 1.684 (0.688–4,122) | 0.253           | 1.763 (0.714–4.353) | 0.219           |
| <b>PCa-death</b>        |                     |                 |                     |                 |
| Age                     | 1.10 (1.05–1.15)    | < 0.01          | 1.10 (1.06–1.16)    | < 0.01          |
| PSA                     | 1.23 (0.73–2.06)    | 0.44            | 1.22 (0.70–2.12)    | 0.48            |
| Gleason sum             | 1.29 (0.950–1.760)  | 0.1             | 1.21 (0.86–1.70)    | 0.28            |
| pT-stage                | 0.98 (0.76–1.22)    | 0.84            | 0.88 (0.70–1.12)    | 0.3             |
| Surgical margin         | 1.09 (0.72–1.64)    | 0.68            | 1.06 (0.70–1.63)    | 0.8             |
| EPCAT4R966              | 1.494 (0.970–2.302) | 0.069           | 1.423 (0.923–2.195) | 0.111           |

**Supplementary Table 7c: Cox regression results for EPCAT2F176 based on TMA1, association with clinical parameters was performed after quantification of *in situ* hybridisation**

| Cox regression          |                     |                 |                     |                 |
|-------------------------|---------------------|-----------------|---------------------|-----------------|
| EPCAT2F176 (pos/neg)    | univariate          |                 | multivariate        |                 |
| BCR                     | HR (95% CI)         | <i>p</i> -value | HR (95% CI)         | <i>p</i> -value |
| Age                     | 1.05 (1.00–1.09)    | 0.04            | 1.03 (0.98–1.07)    | 0.21            |
| PSA                     | 3.51 (2.34–5.26)    | < 0.01          | 1.79 (1.13–2.84)    | 0.03            |
| Gleason score           | 2.47 (1.89–3.26)    | < 0.01          | 1.82 (1.34–2.46)    | < 0.01          |
| pT-stage                | 1.72 (1.46–2.02)    | < 0.01          | 1.25 (1.03–1.52)    | 0.03            |
| Surgical margin         | 3.29 (2.29–4.71)    | < 0.01          | 2.33 (1.59–3.41)    | < 0.01          |
| EPCAT2F176              | 1.434 (0.961–2.141) | 0.078           | 1.403 (0.932–2.111) | 0.105           |
| <b>local recurrence</b> |                     |                 |                     |                 |
| Age                     | 0.96 (0.87–1.05)    | 0.36            | 0.92 (0.84–1.02)    | 0.13            |
| PSA                     | 2.28 (0.83–6.22)    | 0.11            | 0.96 (0.30–3.10)    | 0.95            |
| Gleason sum             | 2.55 (1.35–4.82)    | < 0.01          | 2.08 (1.07–4.05)    | 0.03            |
| pT-stage                | 1.60 (1.10–2.35)    | 0.02            | 1.21 (0.78–1.87)    | 0.39            |
| Surgical margin         | 4.10 (1.73–9.75)    | < 0.01          | 3.27 (1.34–7.95)    | 0.01            |
| EPCAT2F176              | 1.396 (0.541–3.601) | 0.491           | 1.605 (0.610–4.219) | 0.338           |
| <b>PCa-death</b>        |                     |                 |                     |                 |
| Age                     | 1.10 (1.05–1.15)    | < 0.01          | 1.10 (1.06–1.16)    | < 0.01          |
| PSA                     | 1.23 (0.73–2.06)    | 0.44            | 1.22 (0.70–2.12)    | 0.48            |
| Gleason sum             | 1.29 (0.950–1.760)  | 0.1             | 1.21 (0.86–1.70)    | 0.28            |
| pT-stage                | 0.98 (0.76–1.22)    | 0.84            | 0.88 (0.70–1.12)    | 0.3             |
| Surgical margin         | 1.09 (0.72–1.64)    | 0.68            | 1.06 (0.70–1.63)    | 0.8             |
| EPCAT2F176              | 1.173 (0.762–1.807) | 0.468           | 1.116 (0.721–1.727) | 0.624           |

**Supplementary Table 7d: Kaplan-Meier results for two EPCATs and a combination of both based on TMA1, association with clinical parameters was performed after quantification of *in situ* hybridisation**

| Kaplan-Meier         | PSA-progression (BCR) | local recurrence | PCa-death |
|----------------------|-----------------------|------------------|-----------|
| Log-rank EPCAT2F176  | 0.075                 | 0.489            | 0.125     |
| Log-rank EPCAT4R966  | 0.31                  | 0.248            | 0.066     |
| Log-rank combination | 0.134                 | 0.589            | 0.223     |

**Supplementary Table 8: Sequences used for RNAscope *in situ* hybridisation on tissue microarrays**

| EPCAT      | Sequence for RNAscope (5'→3')                                                                                                                                                                                                                                                                                                                                                                                                                                                                                                                                                                                                                                                                                                                                                                                                                                                                                                                                                                                                                                                                                                                                                                                                                                                                                               |
|------------|-----------------------------------------------------------------------------------------------------------------------------------------------------------------------------------------------------------------------------------------------------------------------------------------------------------------------------------------------------------------------------------------------------------------------------------------------------------------------------------------------------------------------------------------------------------------------------------------------------------------------------------------------------------------------------------------------------------------------------------------------------------------------------------------------------------------------------------------------------------------------------------------------------------------------------------------------------------------------------------------------------------------------------------------------------------------------------------------------------------------------------------------------------------------------------------------------------------------------------------------------------------------------------------------------------------------------------|
| EPCAT2F176 | TGCCATCAATATTCTGAAAATGGCAGTGATTTTTAT<br>TCAACCTGTATAAGGCACTTTCACCATGTACCTGGAAGCAA<br>CATCTACATCTTTTTCAGGTTTTCTCTGTCCACTATGAAGG<br>ACTTTGTGACCACATTCTGACTCTGATGAGATCCTGCCC<br>AGAATTGACCTGAACCCCAATAATCACCTTTCTCTCA<br>GGCAATCTAGATGCTGGGGACACAAGGTCCACCTTCCA<br>GGAATATGGCCATGACACCAGAAATCACAAACATGATG<br>AGAATGGAATGACTGGGGAAGAAGTGCCAGATGCTTCA<br>CTTGTAAATGAAGACCCAGCCTCTGGGGATGCAGATA<br>CCACCTCCCTGAAGAAGCTGAATATCTGCAGATAAGTG<br>GAGTTCACCAATGATGAGGAGCGGGATGGAGAAAGGA<br>GGTAGGGAGAGTCATCCAAGGAACATGA<br>GCAACATGTAAAAGG                                                                                                                                                                                                                                                                                                                                                                                                                                                                                                                                                                                                                                                                                                                                                                                             |
| EPCAT4R966 | GTGACACAGAGAATGAGTGGAATACTAATACATT<br>GAAGGGCAAATCAAAACCCAGAA<br>GATCTCTAAAAGTCTGAATGAATCAGCCCATATTACA<br>AGATAAAGTCCATAATGGTAAACGGAAGGCTCTGG<br>TCTTGGTTTACAAAATCCAACCACTCAAATATGTAG<br>TTGCTGGAAGTTTTGTGGCCATGGGGATGCTGACAAA<br>GATTGCTTGGGATGCACACAAGGCAGCGGCGAAGCCT<br>GAGGGGTGCTGCCAGGCCGGGCTCTCCACTGGCCACG<br>AATTTGTACATATGGCTTTGGAACCTCATCCAACAC<br>TAAGTAATGAACATACATGAGGATACTATGTATTTTTCAACC<br>TGCAAGCCCAAGATTTCAAATTCTTTGGTTTATCGCA<br>GAGAACACATCTCTCAAATTGTCTTCAAGGAGC<br>ACTGCAGGAGAAGTCCTGGCAACTTGGCGCAGCGAAT<br>TTGATCAGCACCATACGTACGACCTGTCTCAGGAACG<br>GTGCCATGTGTGACTAGGACTGCAAAGCAGCTT<br>GTGTTCTGGGGGAAATGACAGGCACAGGAAGGAAA<br>AGCTGAGAACACTGAAACGGTTCCTAATCGTGCAGTGG<br>GGAAAGGAGGGCGACTGCCGCGCAGAGTGGCACGTT<br>GGCTGGAAGAGGGGATTGATCAGCAGTGTGGCAGGAA<br>CAGCATAGGCTTGTCTGTGATCTAACAGAAGAGGC<br>AGCAATCTGGAGGCGCCCCAGATCAGAGAAGAGACATCA<br>AGCCCCAGGAGAAATGGATTCCTTTCTCCCCACC<br>CATCAGCTGGGTAGGAAGCCCGAAGGAGCCTTTCATGGAAC<br>TATGGGAAGGGTCTCTGACGCAGAGGGGATG<br>AACTGGAAGCAAGATGCTGACTGTTTCAAAG<br>GCTTGACAGTCAGAAG<br>CAGGCAGGCTTCAGCCTATTGAGATACTTTACCC<br>AAGAGGATTTCCGCTTAGGTTCT<br>GTCTTGAAAGAAATATTCGCTCCCA<br>AATTTCTCCCATCAAGAGTGCTTCT<br>CCCTACAGAAGGCTAAGGCTCACAGGTTGTCCCCAGGGA<br>CACATTTCTTTCAAGTAG<br>GATGACTGGTATGTTTAGACTGAAAAGCTGA<br>TTTACTGGAAGATTGCTATCACCC<br>CCTGGCCTACCATGTC |



**Supplementary Table 9: Sequences of working Taqman probes used for quantitative real-time PCR quantification of 11 EPCATs**

| name        | target exon junction | forward primer sequence   | reverse primer sequence  | sequence 5' FAM 3' TAMRA probe   |
|-------------|----------------------|---------------------------|--------------------------|----------------------------------|
| EPCAT1F273  | J-K                  | CAGAGCTTTCACCTCTAGCATCTGA | CAGTTGTAGGCATCGGTGAA     | TTATCATGGGCCTGGATCTT             |
| EPCAT2F176  | A-B                  | GAACCCACCAGAAGGAAAAA      | GCTTCCAGGTACATGGTGAAA    | TGTAACACTCACTGCGAGGG             |
| EPCAT2R709  | A-D                  | CAGTGCATGGACATTTGAGC      | GGCATGACAGAGGAAACAATTC   | TGGAGCATAACCAACCTT<br>CAGAACTTGT |
| EPCAT3R522  | B-C                  | GTGTTAGTGCATTGGAAAATCA    | TTTCTCTCTCAGTCCAGCAATG   | TCCTGCCAGGCTTTGACTAC             |
| EPCAT4R966  | B-C                  | TGCTGACAAAGATTGCTTGG      | TGCAGTGCTCCTTGAAGACA     | GCTTTGGAAACCTCATCAA              |
| EPCAT5F602  | B-C                  | GGCAATGGAATGACCATTTT      | ATGGTTCCTCTCACGACTGG     | ACCTATGGGCCATAGCCTTT             |
| EPCAT5R633  | A-B                  | TGATCAGTGGCAGAAAGAGC      | ACGAGGTGAGAAATCCGTCA     | AGGGAAAAGGAGCACAGGAT             |
| EPCAT7F524  | A-B                  | TTTGCATGGTGTTTTGGTGT      | CCGATGTCTGTCATCTGGTG     | GGAGAGAGGATGGCATACCA             |
| EPCAT8R190  | D-E                  | AGAGCCACCTTAGCCAATGA      | AAGACCCCAAATCTCATCC      | AGTTCAGGAAGCAGGCACAT             |
| EPCAT15F850 | A-B                  | GGATGCACCGTCACCTATG       | GCCACAACCTCCATAACTTCC    | CCGGCAGCAAGAT<br>GTGTATTCTCA     |
| EPCATXR234  | C-D                  | ACACTGTTTCATCCCCACTCC     | TTTTGTTCCCGTC<br>CTTCTTG | TTTGACACAGAAAAGCACC              |

**Supplementary Table 10: Primer sequences used for validating exons/exon pairs (junction spanning). Primers were considered working (Y) if a band of the expected size was present after electrophoresis. Primers were considered not working (N) if the expected band was missing, differed from expected size or the reaction mix without reverse transcriptase also contained a band of the expected size**
